# Supplementary material for: Genetics, Morphology, Advertisement Calls, and Historical Records Distinguish Six New Polyploid Species of African Clawed Frog (Xenopus, Pipidae) from West and Central Africa
Source: PLoS One. 2015 Dec 16;10(12):e0142823. doi: 10.1371/journal.pone.0142823 (PMC4682732; doi:10.1371/journal.pone.0142823)
Supplement: S1 Table — (XLSX) [file pone.0142823.s016.xlsx]

## Sheet: Sheet1
Supplemental Table 1. Specimens exampled, including morphological measurement and lateral line counts. Rows highlighted in blue have summary statistics for each species. All individuals with field IDs beginning with "Xen" or "AMNH" and all specimens from X. laevis and X. gilli were measured while live, whereas others were measured after fixation in formalin.
Species	Museum ID	Field ID	Locality	Sex	Type Status	SVL	Intraocular	Extraocular	Mouth	Foot length	Snout width	Snout-front eye	Left knee-ankle	Left-elbow finger	Eye Ridges	Oral lateral line	Medial Lateral Line	Lateral lateral line	Ventral lateral line
subgenus Silurana
X. calcaratus
	ZMB 8255A		Cameruns: Victoria; presently Cameroon: Limbe	F	LECTOTYPE	53.29	6.99	9.86	11.4	33.49	9.68	2.96	25.26	17.34
	ZMB 74681		Cameruns: Victoria; presently Cameroon: Limbe	F	PARALECTOTYPE	49.94	6.48	9.36	11.31	31.64	9.27	2.91	23.15	16.18
	CAS 207615		Equatorial Guinea: Bioko Island	F		46.5	5.77	8.54	10.5	23.35	8.81	3.2	22.32	14.43	10	11	16	19	19
	CAS 207616		Equatorial Guinea: Bioko Island	F		44.75	6.1	8.57	8.54	22.77	8.08	3.08	17.19	15.16	10	9	18	20	20
	CAS 207617		Equatorial Guinea: Bioko Island	F		49.67	6.05	8.53	10.49	26.49	8.79	3.16	21.52	14.06	13	9	17	19	21
	CAS 207618		Equatorial Guinea: Bioko Island	F?		46.18	5.83	8.38	9.7	25.63	8.19	3.15	19.86	15.12	10	11	16	19	20
	CAS 207619		Equatorial Guinea: Bioko Island	F		48.2	6.16	9.13	9.88	24.64	9.02	2.42	21.71	16.68	11	10	17	19	20
	CAS 207752		Equatorial Guinea: Bioko Island	F		58.64	7.18	10.59	12.76	25.77	10.63	2.49	24.56	16.13	10	9	19	17	17
	CAS 207753		Equatorial Guinea: Bioko Island	?		21.8	3.25	5.59	5.67	12.97	5.1	1.4	10.37	8.32	11	12	18	21	19
	CAS 207755		Equatorial Guinea: Bioko Island	F		45.87	5.97	8.68	10.89	22.33	8.67	2.61	19.91	15.86	10	10	17	15	17
	CAS 207756		Equatorial Guinea: Bioko Island	F		46.17	5.96	8.83	12.45	26.09	9.34	2.12	21.31	15.27	11	10	15	17	16
	CAS 207757		Equatorial Guinea: Bioko Island	?		25.05	3.62	5.97	5.98	15.85	5.76	1.42	12.46	8.52	11	11	18	18	19
	CAS 207758		Equatorial Guinea: Bioko Island	?		23.48	3.23	5.53	6.07	14.19	5.42	1.62	11.25	9.05	11	10	15	19	16
	CAS 207759		Equatorial Guinea: Bioko Island	F?		48.25	6.15	9.27	11.01	24.9	9.37	2.49	22.82	16.52	9	11	15	17	15
	CAS 207760		Equatorial Guinea: Bioko Island	F		54.92	6.31	9.48	11.24	23.91	9.51	2.51	22.98	16.32	9	12	17	18	14
	CAS 207761		Equatorial Guinea: Bioko Island	F		45.56	5.72	8.78	10.13	24.47	9.11	2.95	21.24	16.39	10	9	15	20	15
	CAS 207762		Equatorial Guinea: Bioko Island	F		53.34	6.25	9.46	11.3	26.44	9.79	3.06	24.18	18.12	9	11	15	19	16
	CAS 207763		Equatorial Guinea: Bioko Island	F		49.95	6.28	9.58	11.18	24.78	9.68	3.16	22.35	16.03	10	10	15	16	16
	CAS 207764		Equatorial Guinea: Bioko Island	F		22.67	3.01	5.29	5.62	13.88	4.7	1.61	10.84	7.87	11	10	16	20	16
		PJM356	Equatorial Guinea: Bioko Island	F		46.45	5.96	8.24	11.25	28.84	8.76	2.08	21.69	15.47
		PJM357	Equatorial Guinea: Bioko Island			39.07	5.41	7.07	9.41	22.71	8.1	2.22	18.48	13.82
		PJM361	Equatorial Guinea: Bioko Island			30.15	4.07	6.52	7.89	17.69	6.79	2	14.54	9.84
	NMP6V 74746	VG05-S	Cameroon: Bakingili	F
	NMP6V 74630/1	VG09-346	Cameroon: Bakingili	F?
	NMP6V 74630/2	VG09-347	Cameroon: Bakingili	F?
	NMP6V 74630/3	VG09-364	Cameroon: Bakingili	M
	NMP6V 74630/4	VG09-365	Cameroon: Bakingili	M
	no voucher	VG09-368	Cameroon: Bakingili	M
	no voucher	VG09-369	Cameroon: Bakingili	M
	aveF	maxF	stdevF	countF	aveM	maxM	stdevM	countM	aveALL	maxALL	sdALL	countALL			10.3529	10.2941	16.4118	18.4118	17.4118
	43.7232	58.64	11.4627	19	-	-	-	-	43.1773	58.64	11.1336	22			13	12	19	21	21
															9	9	15	15	14
															14	14	14	14	14
X. epitropicalis
	BMNH 1982.462		DRC (Zaire): Kinshasa	F	HOLOTYPE	67.59	6.48	10.43	12.27	32.44	10.65	3.58	24.56	18.57	12	11	21	23	19
	lost voucher (MHNG)	AMNH17276	DRC (Zaire): Kinshasa	F		53.8	4.8	8.5	9.2	26	7.8	2.7	15.4	15.2
	lost voucher (MHNG)	AMNH17277	DRC (Zaire): Kinshasa	M		44.2	4.4	7.9	7.9				11.5	15.7
	lost voucher (MHNG)	AMNH17278	DRC (Zaire): Kinshasa	F		52.7	4.6	8.7	8.7				14.8	15.5
	MHNG 2644.056	AMNH17275	DRC (Zaire): Kinshasa	M		43.1	4.4	8.2	7.9	23.5	6.3	2.3	14.5	15.4
	no voucher	Xen151	DRC (Zaire): Kinshasa	F		57.6	5	9.2	9.7	27	7.3	2.5	14.2	16
	no voucher	Xen152	DRC (Zaire): Kinshasa	M		43.7	4.7	8.4	9.3	24.1	6.8	2.4	13.6	16
	no voucher	Xen153	DRC (Zaire): Kinshasa	F		55.8	4.6	9.3	9.7	24.9	7.7	2.9	13.9	15.4
	no voucher	Xen154	DRC (Zaire): Kinshasa	M		40.6	4.8	7.5	8.3	22.8	6.9	2.5	12.9	14.5
	no voucher	Xen155	DRC (Zaire): Kinshasa	F		53.5	5	8.8	9	25.7	7.5	2	16.2	16.2
	no voucher	Xen156	DRC (Zaire): Kinshasa	M		43.8	4.1	8.5	9.5	23.4	7	2.5	12.9	15.9
	no voucher	Xen157	DRC (Zaire): Kinshasa	M		40	4.4	7.9	8.7	21.7	6.5	2.4	10.5	14.4
	no voucher	Xen158	DRC (Zaire): Kinshasa	F		59.3	5.2	9.5	10.7	28.2	7.8	2.9	15.7	16.3
	no voucher	Xen159	DRC (Zaire): Kinshasa	F		55.1	5.3	9.1	9.5	25.2	7.5	2.5	15.1	14.5
	no voucher	Xen160	DRC (Zaire): Kinshasa	F		47.2	4.9	8.4	8.8	21.9	7.3	2.5	10.7	14.5
	no voucher	Xen161	DRC (Zaire): Kinshasa	M		45.1	4.4	9	8.8	26.1	7.3	2.6	12.8	15.8
	no voucher	Xen162	DRC (Zaire): Kinshasa	M		42.8	4.6	8.9	8.1	22.5	7.3	2.4	12	15.5
	no voucher	Xen163	DRC (Zaire): Kinshasa	M		43.8	4.2	8.3	8.1	23.5	6.8	2.5	13.9	16
	no voucher	Xen164	DRC (Zaire): Kinshasa	M		40.3	4.1	7.9	8.3	23	6.7	2.2	13	15.1
	no voucher	Xen165	DRC (Zaire): Kinshasa	F		53	5.1	9	9.9	27	8.4	2.8	16.2	15.6
	no voucher	Xen166	DRC (Zaire): Kinshasa	M		43.5	4.8	8.7	8.7	24.5	7.1	2.8	13.8	16.2
	no voucher	Xen167	DRC (Zaire): Kinshasa	M		48.5	5.1	9	9.6	26.4	7.9	3.1	14.3	17.4
	no voucher	Xen168	DRC (Zaire): Kinshasa	F		56.6	5.1	10.4	9.6	25.1	7.7	2.4	13.3	16.4
	no voucher	Xen169	DRC (Zaire): Kinshasa	F		57	4.6	8.8	9.6	25.3	7.3	2.6	16.1	15.5
	UTEP 21188	ELI 1754	DRC: Bandundu
	UTEP 21189	ELI 1799	DRC: Bandundu
	UTEP 21190	ELI 1800	DRC: Bandundu
	averageF	maxF	stdevF	countF	aveM	maxM	stdevM	countM	aveALL	maxALL	stdevALL	countALL
	55.7658	67.59	4.84064	12	43.2833	48.5	2.32098	12	49.5246	67.59	7.37765	24
X. mellotropicalis
	NCSM 76797	BLS13506	Gabon: Estuaire	M(NUPTIAL PADS)	HOLOTYPE	48.37	5.62	8.96	10.13	26.23	9.3	2.51	22.02	18.04	11	12	17	17	13
	CAS 255058	BJE3652	Congo Republic: Malemba	F	PARATYPE
	MHNG 2644.058	AMNH17288	Cameroon: Nkoemvone	M	PARATYPE	45.7	5	9.3	8.2	27	7.2	2.5	15.2	16.7
	NCSM 78871	BLS 14731	Gabon: Ogooué-Ivindo	F	PARATYPE	46.33	5.35	8.16	9.16	27.14	8.26	2.36	21.4	15.21	11	13	17	19	18
	NCSM 78881	BLS 14876	Gabon: Ogooué-Ivindo		PARATYPE	31.28	4.26	6.57	7.16	19.77	6.26	2.23	15.02	11.49
	no voucher	VG10-178	Cameroon: Ngoum-Bandi	tadpole	PARATYPE
	NMP6V 74568	VG09-069	Cameroon: Centre Region: Ebogo	F	PARATYPE
	NMP6V 74718	VG10-196	Cameroon: Kika	F	PARATYPE
	ZFMK 87790	VG10_04	Cameroon: Nkoelon		PARATYPE
	ZFMK 87791		Cameroon: Nkoelon		PARATYPE
	lost voucher (MHNG)	AMNH17289	Cameroon: Nkoemvone	F		55.3	5.6	9.4	10	28.2	8	2.7	16.4	17.5
	lost voucher (MHNG)	AMNH17291	Cameroon: Nkoemvone	F		54.1	5	9.1	9.3	27	7.8	2.6	16	16.6
	lost voucher (MHNG)	AMNH17290	Cameroon: Nkoemvone	M		49.4	4.8	8.5	9.3	28.2	7.4	2.4	15.5	16.9
	NCSM 78873	BLS 14809	Gabon: Ogooué-Ivindo	F?		35.65	4.11	6.93	7.66	19.66	6.81	2.23	16.62	11.98
	CAS 143239		Central African Republic	M(NUPTIAL PADS)		51.02	5.94	8.56	10.28	28.49	9.53	2.43	20.38	19.21	12	10	19	19	16
	CAS 152557		Gabon: Moyen-Ogooue Pr.: Alembo												10	10	16	16	10
	no voucher	Xen072	Cameroon: Nkoemvone	F		57.6	4.9	9.3	9.9	26.3	8.1	2.6	15	16.6
	no voucher	Xen073	Cameroon: Nkoemvone	F		55.6	4.7	9.2	9	24.8	7.6	2.2	14.7	15.4
	no voucher	Xen075	Cameroon: Nkoemvone	F		55.1	5.2	9.3	9.6	26.1	7.8	2.6	14.9	16.5
	no voucher	Xen076	Cameroon: Nkoemvone	F		56.5	4.8	9.1	9.4	25.4	7.6	2.3	14.5	15.8
	no voucher	Xen077	Cameroon: Nkoemvone	F		54.9	5.2	9	9.4	24.7	7.7	1.9	14.7	15.5
	no voucher	Xen086	Cameroon: Nkoemvone	F		55.2	5	9.1	8.8	26	7.7	2.6	15.6	16.5
	no voucher	Xen087	Cameroon: Nkoemvone	F		55.5	4.7	8.8	9	24.9	7.3	2.6	13.9	15.9
	no voucher	Xen088	Cameroon: Nkoemvone	F		55	4.6	9.2	9.7	27.9	7.6	2.1	15	16.5
	no voucher	Xen089	Cameroon: Nkoemvone	F		56.5	4.9	9.4	9.4	25.5	7.7	2.6	15.1	15.9
	no voucher	Xen090	Cameroon: Nkoemvone	F		54.7	5.1	9.4	9.2	26.1	8.2	2.8	16.1	15.6
	no voucher	Xen071	Cameroon: Nkoemvone	M		45.9	4.8	8.4	8.6	24.1	7.4	2.2	13.5	15.9
	no voucher	Xen074	Cameroon: Nkoemvone	M		46.2	4.6	8.6	8.3	24.7	7.4	2.4	14.4	16.6
	no voucher	Xen078	Cameroon: Nkoemvone	M		45.5	4.8	8.4	8.1	23.6	7	2.4	13.2	15.6
	no voucher	Xen079	Cameroon: Nkoemvone	M		42.8	4.6	8.5	8.5	24.1	7.3	2.3	14	15.3
	no voucher	Xen080	Cameroon: Nkoemvone	M		39.7	3.8	7.8	8.6	22.8	6.8	2.2	13.5	13.7
	no voucher	Xen081	Cameroon: Nkoemvone	M		45.1	4.9	8.7	9	22.9	7.4	2.2	13.3	15.3
	no voucher	Xen082	Cameroon: Nkoemvone	M		46	5.2	8.9	8.2	24.6	7.6	2.5	14.2	16.2
	no voucher	Xen083	Cameroon: Nkoemvone	M		45.3	4.5	8.3	8.8	23.8	7.2	2.4	14.9	16.1
	no voucher	Xen084	Cameroon: Nkoemvone	M		42	4.3	7.8	7.7	23.5	6.6	2.1	14	15.3
	no voucher	Xen085	Cameroon: Nkoemvone	M		45.5	4.8	8.5	8.4	23.8	7.5	2.8	13.6	15.1
	no voucher	BJE3013	Cameroon: Edea	tadpole
	IRSNB	PM106	DRC: Bas-Congo: Luki Reserve
	IRSNB	PM119	DRC: Bas-Congo: Tsumba-Kituti
	UTEP 21191	ELI 1679	DRC: Bombo-Lumene Reserve
	UTEP 21192	ELI 1724	DRC: Bombo-Lumene Reserve
	UTEP 21193	ELI 1725	DRC: Bombo-Lumene Reserve
	aveF	maxF	stdevF	countF	aveM	maxM	stdevM	countM	aveALL	maxALL		countALL			11	11.25	17.25	17.75	14.25
	53.4271	57.6	5.73704	14	45.3683	51.02	3.01138	12	48.8879	57.6	6.77499	29			12	13	19	19	18
															10	10	16	16	10
															4	4	4	4	4
X. tropicalis
	BMNH 1947.2.24.83		Nigeria: Lagos	juvenile	SYNTYPES
	BMNH 1947.2.24.84		Nigeria: Lagos	juvenile	SYNTYPES
	BMNH 1947.2.24.85		Nigeria: Lagos	juvenile	SYNTYPES
	BMNH 1947.2.24.86		Nigeria: Lagos	juvenile	SYNTYPES
	CAS 104033		Ghana: Eastern Region	?		32.16	4.46	6.73	7.12	17.14	6.54	2.23	14.51	10.81	10	11	18	19	18
	CAS 123517		Ghana: Mamfe	M		43.39	5.48	8.3	9.48	25.48	7.65	1.98	20.16	15.61	12	11	18	20	18
	CAS 123518		Ghana: Mamfe	F		53.2	6.36	8.87	11.49	26.15	9.54	2.6	23.9	18.16	11	12	17	21	19
	CAS 123519		Ghana: Mamfe	M		44.4	5.53	8.06	9.74	23.53	8.78	2.36	20.4	16.42	10	11	17	20	17
	CAS 123520		Ghana: Mamfe	M		42.83	5.34	8.1	10.22	26.13	7.85	2.06	21.32	16.37	12	11	19	20	18
	CAS 123521		Ghana: Mamfe	M		43.38	5.92	8.29	9.14	24.86	8.17	1.99	21.01	16.77	10	12	20	21	21
	CAS 123522		Ghana: Mamfe	F		55.23	6.54	9.69	11.77	31.51	9.8	2.93	23.98	18.35	12	10	19	21	21
	CAS 141768		Ghana: Eastern Region	?		31.22	4.01	6.42	7.55	18.3	6.65	2.04	14.78	11.01	8	9	18	19	16
	CAS 141815		Nigeria: Ogun	?		24.29	3.09	5.27	5.97	13.99	5.3	1.79	11.37	8.21	9	9	18	20	19
	CAS 146171		Ghana: Tafo												10	11	21	22	16
	CAS 230111		Sierra Leone: Southern Pr.	F?		43.45	5.47	8.15	10.06	26.28	8.13	2.56	19.9	14.64	10	9	16	17	17
	CAS 230112		Sierra Leone: Southern Pr.	F		44.37	5.47	8.25	9.62	24.87	8.47	2.47	19.7	14.38	11	12	16	21	17
	CAS 97476		Ghana: Western Region	M		35.97	4.24	6.57	7.16	19.32	6.95	2.3	16.93	13.64	10	11	19	20	20
	CAS 97492		Ghana: Western Region	F?		22.03	3.27	4.84	5.36	11.8	4.82	1.49	10.4	6.88	10	10	16	18	19
	CAS 97493		Ghana: Western Region	F?		29.95	4.05	6.05	6.9	15.82	6.23	2.41	13.63	10.61	10	12	16	19	18
	lost voucher (MHNG)	AMNH17272	Sierra Leone: Freetown	F		59.2	6	10.6	11.3	27.4	9.4	3	16	17.9
	lost voucher (MHNG)	AMNH17274	Sierra Leone: Freetown	F		59.4	5.2	10.2	11.6	25.1	8.9	2.4	14.9	16.2
	lost voucher (MHNG)	AMNH17273	Sierra Leone: Freetown	M		44.2	5	8.9	8.2	23.3	6.7	2.4	14.1	14.8
	MHNG 2644.055	AMNH17271	Sierra Leone: Freetown	M		40.4	4.2	8	8.2	21.6	7.2	2.3	12.7	14.6
	no voucher	Xen091	Sierra Leone: Freetown	F		57.8	5.3	9.1	10.2	24.5	8.3	2.9	14.9	16.4
	no voucher	Xen092	Sierra Leone: Freetown	F		53.1	4.9	8.7	9.1	23.2	7.9	2.2	12.9	14.8
	no voucher	Xen095	Sierra Leone: Freetown	F		56.9	5.5	9.5	10.1	24.8	8.7	2.7	16.1	16.8
	no voucher	Xen096	Sierra Leone: Freetown	F		52.4	4.9	9.2	11.3	23.5	8	2.4	13.8	15.4
	no voucher	Xen097	Sierra Leone: Freetown	F		56.5	4.7	9.3	10	24.1	7.7	2.5	14	16.3
	no voucher	Xen098	Sierra Leone: Freetown	F		50.1	5.3	9.4	10.3	26.1	8.2	2.6	14.8	15.8
	no voucher	Xen099	Sierra Leone: Freetown	F		58.5	5.4	9.9	9.9	27.9	8.8	3	15.8	17.6
	no voucher	Xen100	Sierra Leone: Freetown	F		52.7	5.3	9.1	9.7	25.5	7.9	2.8	13.7	16.8
	no voucher	Xen101	Sierra Leone: Freetown	F		51.7	4.7	9.3	10	24.6	8.2	2.5	13.8	15.8
	no voucher	Xen102	Sierra Leone: Freetown	F		53.6	5.2	9.7	10.5	25.5	7.7	2.7	14.2	16.6
	no voucher	Xen093	Sierra Leone: Freetown	M		41	4.3	7.8	8.4	21.8	6.8	2.1	11.7	15.2
	no voucher	Xen094	Sierra Leone: Freetown	M		41.9	4.3	7.6	8.6	23.6	6.6	2.2	13.1	15.8
	no voucher	Xen103	Sierra Leone: Freetown	M		42.1	4.8	7.7	8.5	23.1	7.3	2.5	12.9	15.6
	no voucher	Xen104	Sierra Leone: Freetown	M		43.4	4.6	8.1	8.9	22.9	7.1	2.6	12.1	16
	no voucher	Xen105	Sierra Leone: Freetown	M		43	4.4	8	8.6	22	6.9	2.4	12.1	14.9
	no voucher	Xen106	Sierra Leone: Freetown	M		40.4	4.1	7.8	8.3	21.9	6.9	2.3	12.5	15.1
	no voucher	Xen107	Sierra Leone: Freetown	M		42.5	4.2	7.7	8.8	22.6	6.7	2.5	13.1	15.8
	no voucher	Xen108	Sierra Leone: Freetown	M		42.7	4.5	7.9	8.5	22.5	6.8	2.5	13	15.1
	no voucher	Xen109	Sierra Leone: Freetown	M		42.3	4.3	8	8.1	21.1	6.8	2.6	13.3	14.9
	no voucher	xen228	Ivory Coast: Adiopo Doume
	no voucher	xen231	Nigeria: Uyere
	NMP6V 74659	VG10-40	Cameroon: Munkep	F
	ROM 19161	tropicalis.L1720	Liberia: Sinoe Province
	UWBM 5957	ADL3902	Ghana: Eastern Region
	UWBM 5958	ADL3903	Ghana: Eastern Region
	UWBM 5959	ADL3904	Ghana: Eastern Region
	UWBM 5961	ADL3906	Ghana: Eastern Region
	UWBM 5962	ADL3907	Ghana: Eastern Region
	UWBM 5963	ADL4016	Ghana: Eastern Region
	ZFMK 87781	VG10-01	Cameroon: Mamfe Region
	aveF	maxF	stdevF	countF	aveM	maxM	stdevM	countM	aveALL	maxALL	stdevALL	countALL			10.3333	10.7333	17.8667	19.8667	18.2667
	50.5628	59.4	10.0741	18	42.1169	44.4	2.01986	16	45.1803	59.4	9.51452	37			12	12	21	22	21
															8	9	16	17	16
															15	15	15	15	15
X. sp. nov.
	NMP6V 74588/2	VG09-104	Cameroon: Tchabal Gangdaba	juvenile
	NMP6V 74588/6	VG09-114	Cameroon: Tchabal Gangdaba	M
	NMP6V 74588/1	VG09-98	Cameroon: Tchabal Gangdaba	M
subgenus Xenopus
amieti group
X. allofraseri
	CAS 207765	RCD13495	Equatorial Guinea: Bioko Sur Province	F	HOLOTYPE	47.98	6.2	10.54	13.02	27.34	10.28	3.23	18.42	17.15
	MCZ A-148161	BJE3485	Equatorial Guinea: Bioko Sur Province	F	PARATYPE	33.47	4.59	7.73	9.71	22.05	7.82	2.07	15.77	13.42	14	12	16	20
	MCZ A-148162	BJE3486	Equatorial Guinea: Bioko Sur Province	M	PARATYPE	36.56	5.02	8.16	10.24	23.01	8.48	2.87	16.64	14.03	13	15	15	20
	MCZ A-148163	BJE3487	Equatorial Guinea: Bioko Sur Province	F	PARATYPE	42.5	5.44	9.17	42.22	24.32	8.85	2.55	17.5	14.96	12	14	16	21
	MCZ A-148164	BJE3488	Equatorial Guinea: Bioko Sur Province	F	PARATYPE	38.8	5.37	8.9	11.78	23.56	8.82	2.76	17.98	14.75	15	14	17	23	17
	MCZ A-148166	BJE3490	Equatorial Guinea: Bioko Sur Province	M?	PARATYPE	28.33	4.23	7.24	8.88	18.61	7.25	2.08	13.46	12.26	11	11	15	18
	MCZ A-148167	BJE3491	Equatorial Guinea: Bioko Sur Province	M	PARATYPE	34.78	4.59	8.14	10.82	22.71	8.35	2.62	16.71	15.27	12	12	16	21
	MCZ A-148168	BJE3492	Equatorial Guinea: Bioko Sur Province	M	PARATYPE	30.25	4.56	7.73	8.95	20.4	7.41	2.17	14.73	13.05	11	10	15	20
	MCZ A-148169	BJE3493	Equatorial Guinea: Bioko Sur Province	F	PARATYPE	31.73	4.48	7.63	9.05	22.16	7.52	1.94	16.17	13.94	13	13	17	22
	MCZ A-148170	BJE3494	Equatorial Guinea: Bioko Sur Province	F	PARATYPE	27.44	4.11	6.98	8.58	17.79	6.78	2.02	12.88	11.4	13	13	16	18
	MCZ A-148172	BJE3496	Equatorial Guinea: Bioko Sur Province	M	PARATYPE	37.77	4.58	8.25	10.25	23.31	8.16	2.16	16.77	15.37	13	13	16	19
	MCZ A-148173	BJE3497	Equatorial Guinea: Bioko Sur Province	F	PARATYPE	34.52	4.51	7.84	9.61	21.22	7.58	2.02	15.7	13.91	12	12	15	19
	MCZ A-148174	BJE3498	Equatorial Guinea: Bioko Sur Province	M	PARATYPE	34.67	4.94	8.41	10.65	22.86	8.12	1.99	16.06	14.78	13	13	15	18
	MCZ A-148175	BJE3499	Equatorial Guinea: Bioko Sur Province	F	PARATYPE	32.74	4.4	7.62	9.38	21.6	7.85	2.22	15.19	14	13	12	14	20
	MCZ A-148176	BJE3500	Equatorial Guinea: Bioko Sur Province	M	PARATYPE	35.45	4.85	8	9.99	22.63	7.8	2.04	16.62	14.74	12	12	16	20	17
	MCZ A-148177	BJE3501	Equatorial Guinea: Bioko Sur Province	F	PARATYPE	41.72	5.86	9.88	11.69	24.1	8.83	2.35	17.87	15.71	14	11	15	20
	MCZ A-148178	BJE3502	Equatorial Guinea: Bioko Sur Province	F	PARATYPE	43.17	5.82	9.89	12.22	24.35	9.45	2.59	18.4	15.83	12	12	15	23
	MCZ A-148165	BJE3489	Equatorial Guinea: Bioko Sur Province												12	13	17	23
	MCZ A-148171	BJE3495	Equatorial Guinea: Bioko Sur Province												13	14	13	20
	CAS 207766	RCD 13499	Equatorial Guinea: Bioko Sur Province	F?		25.47	4.01	6.8	7.77	16.81	5.98	1.96	12.12	10.77
	CAS 207767	RCD 13500	Equatorial Guinea: Bioko Sur Province	F?		22.71	3.51	6.15	6.53	14.47	5.67	1.76	9.74	10.22
	CAS 207768	RCD 13501	Equatorial Guinea: Bioko Sur Province	?		28.4	4.17	7.31	8.45	18.55	6.92	2.46	13.31	12.54
	CAS 207769	RCD 13503	Equatorial Guinea: Bioko Sur Province	F?		24.29	3.58	6.13	7.27	16.01	6.11	2.17	11.7	11.17
	CAS 207770	RCD 13504	Equatorial Guinea: Bioko Sur Province	F?		29.29	4.35	7.32	8.49	18.25	7.06	2.62	14.33	12.74
	MCZ A-148165	BJE3489	Equatorial Guinea: Bioko Sur Province	F?		31.47	4.54	7.26	10	19.93	7.85	2.11	14.46	13.37
	MCZ A-148171	BJE3495	Equatorial Guinea: Bioko Sur Province	F		34.51	4.62	8.72	10.8	21.09	8.72	2.39	15.74	14.41
	no voucher	BJE3461	Equatorial Guinea: Bioko Sur Province
	no voucher	BJE3462	Equatorial Guinea: Bioko Sur Province
	no voucher	BJE3463	Equatorial Guinea: Bioko Sur Province
	no voucher	BJE3464	Equatorial Guinea: Bioko Sur Province
	no voucher	BJE3465	Equatorial Guinea: Bioko Sur Province
	no voucher	BJE3466	Equatorial Guinea: Bioko Sur Province
	no voucher	BJE3467	Equatorial Guinea: Bioko Sur Province
	no voucher	BJE3468	Equatorial Guinea: Bioko Sur Province
	no voucher	BJE3469	Equatorial Guinea: Bioko Sur Province
	no voucher	BJE3470	Equatorial Guinea: Bioko Sur Province
	no voucher	BJE3471	Equatorial Guinea: Bioko Sur Province
	no voucher	BJE3472	Equatorial Guinea: Bioko Sur Province
	no voucher	BJE3473	Equatorial Guinea: Bioko Sur Province
	no voucher	BJE3474	Equatorial Guinea: Bioko Sur Province
	no voucher	BJE3475	Equatorial Guinea: Bioko Sur Province
	no voucher	BJE3476	Equatorial Guinea: Bioko Sur Province
	no voucher	BJE3477	Equatorial Guinea: Bioko Sur Province
	no voucher	BJE3478	Equatorial Guinea: Bioko Sur Province
	no voucher	BJE3479	Equatorial Guinea: Bioko Sur Province
	no voucher	BJE3480	Equatorial Guinea: Bioko Sur Province
	no voucher	BJE3481	Equatorial Guinea: Bioko Sur Province
	no voucher	BJE3482	Equatorial Guinea: Bioko Sur Province
	no voucher	VG09-357	Cameroon: Bakingili	tadpole
	NMP6V 74627/5	VG09-370	Cameroon: Bakingili	F
	IRSNB	PM107	DRC: Bas-Congo: Luki Reserve	M
	IRSNB	PM110	DRC: Bas-Congo: Luki Reserve	F
	IRSNB	PM113	DRC: Bas-Congo: Luki Reserve	M
	IRSNB	PM114	DRC: Bas-Congo: Luki Reserve	M
		PJM355	Equatorial Guinea: Bioko Sur Province			34.53	5.08	8.35	9.81	23.25	8.22	2.01	17.66	13.21
		PJM358	Equatorial Guinea: Bioko Sur Province			26.77	3.55	6.25	7.53	17.26	6.65	1.94	12.48	11.27
		PJM359	Equatorial Guinea: Bioko Sur Province			26.18	3.93	5.78	7.37	16.98	6.01	1.78	12.46	10.39
		PJM360	Equatorial Guinea: Bioko Sur Province	F		41.64	6.05	9.4	10.25	27.43	7.84	1.96	19.91	16.97
	no voucher	XL_L_23	Equatorial Guinea: Bioko Sur Province
	no voucher	XL_L_24	Equatorial Guinea: Bioko Sur Province
	no voucher	XL_L_3	Equatorial Guinea: Bioko Sur Province
	no voucher	XL_L_33	Equatorial Guinea: Bioko Sur Province
	no voucher	XL_L_34	Equatorial Guinea: Bioko Sur Province
	no voucher	XL_L_4	Equatorial Guinea: Bioko Sur Province
	aveF	maxF	stdevF	countF	aveM	stdevM	maxM	countM	aveALL	stdevALL	maxALL	countALL			12.6667	12.5556	15.5	20.2778	17
	34.3206	47.98	7.35153	17	34.5933	3.28521	37.77	6	33.4693	6.30633	47.98	24			15	15	17	23	17
															11	10	13	18	17
															18	18	18	18	2
X. amieti
	MHNG 2030. 80		Cameroon: Manengouba	F	HOLOTYPE	48.98	5.79	10.07	11.81	24.18	9.02	2.94	18.9	14.1	13	15	19	24	23
	MHNG 2030. 81		Cameroon: Manengouba	m?	PARATYPE	34.93	4.7	8.3	10.59	21.77	8.69	2.93	14.93	13.87	15	11	25	26	27
	MHNG 2030. 82		Cameroon: Manengouba	M	PARATYPE	35.04	4.86	8.29	9.91	21	7.64	2.32	15.21	14.2	17	13	25	24	23
	KU 216398		Cameroon: Galim														18	21
	KU 216400		Cameroon: Galim	?		36.74	3.93	7.36	8.46	19.08	6.77	2.47	13.66	12.2		9	18	21
	KU 216402		Cameroon: Galim													10	14	19
	KU 216403		Cameroon: Galim	?		45.79	4.19	9.17	10.23	21.77	7.43	2.43	16.42	12.57	13	10	17	20
	KU 216404		Cameroon: Galim	?		37.58	4.27	7.58	8.77	19.7	7.14	2.47	15.13	12.94		11	17	19
	KU 216405		Cameroon: Galim													11	19	20
	KU 216406		Cameroon: Galim	?		36.08	4.41	7.65	8.79	20.39	6.88	2.15	14.34	13.48		13	20	20
	KU 216407		Cameroon: Galim	?		36.72	3.96	8.3	8.65	20.61	7.44	2.37	14.98	14.37		9	17	20
	KU 216408		Cameroon: Galim	?		37.48	4.12	7.64	8.24	20.64	6.99	2.47	14.72	11.96	13	10	18	19	13
	KU 216409		Cameroon: Galim	?		34.87	3.91	7.16	7.78	17.84	6.13	2.01	13.17	18.32	13	10	19	21
	KU 216410		Cameroon: Galim	?		35.69	4.39	7.74	8.28	19.38	6.51	1.97	14.09	12.12		8	18	20	15
	KU 216411		Cameroon: Galim														16	18
	KU 216413		Cameroon: Galim													10	15	20	18
	KU 216414		Cameroon: Galim	?		33.86	3.84	7.35	8.53	19.81	7.02	1.95	13.75	11.81		9	19	21	13
	KU 216415		Cameroon: Galim	?		33.53	3.6	6.97	7.81	19	6.18	1.93	14.06	12.17	14	9	18	20	16
	KU 216417		Cameroon: Manengouba	M		35.41	4.29	7.99	9.06	19.84	7.23	2.64	21.25	14.05
	KU 216418		Cameroon: Manengouba	F		43.6	4.98	8.29	9.89	21.99	7.53	2.26	16.49	13.59
	KU 216419		Cameroon: Manengouba	F?		45.06	4.93	9.1	10.49	21.97	8.77	2.61	16.43	13.06
	KU 216420		Cameroon: Manengouba	M		37.11	4.1	8.1	8.75	20.96	6.86	2.73	14.83	13.48	13	9	21	22
	KU 216421		Cameroon: Manengouba	M		33.94	4.18	7.64	8.63	18.82	6.82	2.16	19.16	12.3	12		18	23
	KU 216422		Cameroon: Manengouba	?		37.39	4.41	8.21	9.05	20.31	7.14	1.86	14.58	13.83	11		17	23
	KU 216423		Cameroon: Manengouba	M		39.91	4.93	7.81	9.53	21.38	7.51	2.25	15.33	14.42		14	19	20	21
	KU 216424		Cameroon: Manengouba	F		43.25	5.31	9.43	10.43	19.5	8.56	3.16	16.14	13.72	12	10	19	21	20
	KU 216425		Cameroon: Manengouba	M?		38.98	4.71	7.9	9.25	19.28	7.68	2.21	14.12	14.39	12	9	21	19	21
	KU 216426		Cameroon: Manengouba	M?		39.42	4.85	8.6	9.64	18.97	7.46	2.05	15.54	14.16			17	21
	MHNG 2644.054	AMNH17267	Cameroon: Galim	M		34.4	3.5	8.1	8.5	20.7	5.9	2.2	10.7	12.9
	MHNG 2645.079	AMNH17268	Cameroon: Galim	M		36.7	3.3	8.4	10	21.3			10.7	13.2
	MHNG 2645.080	AMNH17269	Cameroon: Galim	F		45.7	3.6	9	10.2	22.5	7.4	2.4	12.4	14.4
	MHNG 2645.081	AMNH17270	Cameroon: Galim	F		42.4	3.5	9.3	10.5					14.4
	no voucher	BJE3160		tadpole
	no voucher	BJE3161		tadpole
	no voucher	BJE3162		tadpole
	AveF	maxF	stdevF	countF	aveM	maxM	stdevM	countM	aveALL	maxALL	stdevALL	countALL			13.1667	10.5	18.56	20.88	19.0909
	44.8317	48.98	2.36417	6	36.584	39.91	2.19582	10	38.5393	48.98	4.31562	27			17	15	25	26	27
															11	8	14	18	13
															12	20	25	25	11
X. andrei
	MHNG 2088. 32		Cameroon: Longyi	F	HOLOTYPE	38.36	4.35	8.24	9.57	19.45	6.93	2.18	15.6	14.18	10	13	16	16	17
	MHNG 2644.051	AMNH17255	Cameroon: Longyi	M		33.4	3.4	8.3	8.2	19	5.8	2.4	10.7	13.5
	MHNG 2645.070	AMNH17256	Cameroon: Longyi
	MHNG 2645.071	AMNH17257	Cameroon: Longyi	M		32.3	3.3	7.9	8.1	17.5	5.7	2.3	9.7	12.5
	MHNG 2645.072	AMNH17258	Cameroon: Longyi	F		47.5	4.3	10.3	10.2	23.2	7.1	2.5	12.6	16.8
	KU 208155		Cameroon: Longyi	M		37.3	4.46	7.77	9.17	16.46	6.29	1.6	14.65	12.4
	KU 216427		Cameroon: Longyi	?		35.23	4.85	8.28	9.74	21.69	7.2	2.24	15.12	12.27
	KU 216428		Cameroon: Longyi	M		35.54	3.94	8.06	9.39	19.27	6.83	1.61	15.16	13.81
	no voucher	Xen021	Cameroon: Longyi	F		45.9	3.8	10	10.5	21.8	7.2	2.5	12.8	16.5
	no voucher	Xen022	Cameroon: Longyi	F		52.5	4.3	10.7	11.8	24.8	7.7	3	13.9	17.5
	no voucher	Xen023	Cameroon: Longyi	F		48.7	4.8	10.5	12.1	23.1	8.1	2.8	13.7	17.2
	no voucher	Xen024	Cameroon: Longyi	M		36.7	3.7	8.7	9.2	19.4	6.5	2	11.9	14.5
	no voucher	Xen025	Cameroon: Longyi	M		33.7	3.2	8	8.2	17.9	6.4	2.2	9.7	13.2
	no voucher	Xen026	Cameroon: Longyi	M		32.9	3	7.8	8.3	17.6	6.5	2	10.3	13.2
	no voucher	Xen027	Cameroon: Longyi	M		34.1	3.2	8.1	9	18	6.3	2.3	10.5	14
	no voucher	Xen028	Cameroon: Longyi	M		35.8	3.4	8.6	8.8	18.4	7.3	2.6	10.1	14.3
	no voucher	Xen029	Cameroon: Longyi	M		34.1	3.5	8.2	8.2	17.4	7	2.4	9.6	13.1
	no voucher	Xen030	Cameroon: Longyi	F		51.5	4.6	10.1	12.5	24.5	7.8	2.8	13.3	18
	no voucher	Xen031	Cameroon: Longyi	F		48.4	4.1	10.1	11.4	21.5	7.4	2.6	12.1	17.3
	no voucher	Xen032	Cameroon: Longyi	F		48.7	4.8	10.2	11.3	22	7.1	2.3	12.6	17.8
	no voucher	Xen033	Cameroon: Longyi	F		46.3	4.7	10.4	10.7	22.4	7.4	2.5	12.2	16.9
	no voucher	Xen034	Cameroon: Longyi	M		36.9	4.3	8.8	9.4	20.9	6.9	2	12	15.2
	no voucher	Xen035	Cameroon: Longyi	M		36.5	3.7	8.5	8.8	19.7	6.4	2.2	11.4	14.8
	no voucher	Xen036	Cameroon: Longyi	F		45.3	4.2	10.2	10.3	21.5	7.2	2.2	12.1	15.2
	no voucher	Xen037	Cameroon: Longyi	F		51.8	5.1	10.9	11.2	22.6	8.1	3	12.9	17.2
	aveF	maxF	stdevF	countF	aveM	maxM	stdevM	countM	aveALL	maxALL	stdevALL	countALL			10	13	16	16	17
	47.7236	52.5	3.93712	11	34.9367	37.3	1.71871	12	40.8096	52.5	7.09677	24			10	13	16	16	17
															10	13	16	16	17
															1	1	1	1	1
X. boumbaensis
	MHNG 2088.31		Cameroon: Moloundou	F	HOLOTYPE	52.52	5.98	10.01	14.63	28.5	9.57	3.31	22.27	18	13	12	14	18	17
	MHNG 2645.085	AMNH17283	Cameroon: Moloundou	M		36.9	3.4	9.5	9.6	20.9	6.8	2.7	10.6	14.2
	MHNG 2644.057	AMNH17284	Cameroon: Moloundou	F		47.8	4.7	10.3	11.3	23.5	8.5	3.4	11.4	14.9
	MHNG 2645.086	AMNH17285	Cameroon: Moloundou	M		35.1	3.2	7.9	8.8	18.7	6.8	2.7	10.4	13.2
	MHNG 2645.087	AMNH17286	Cameroon: Moloundou	F		45	4.3	9.6	11.4	23.5	9.2	3	11.7	14.9
	KU 208156		Cameroon: Moloundou												10	12	18	22	21
	KU 208157		Cameroon: Moloundou												13	13	17	23	22
	KU 208158		Cameroon: Moloundou	F		28.96	3.77	6.98	7.53	17.39	6.51	2.22	12.11	11.1	13	15	16	25	23
	KU 208159		Cameroon: Moloundou	F		28.44	3.54	6.33	7.15	14.82	6.58	2.5	11.62	9.62	13	12	16	20	19
	KU 208160		Cameroon: Moloundou												16	14	17	23	20
	KU 208161		Cameroon: Moloundou	F		28.79	3.56	6.68	7.89	6.04	6.45	2.25	13.21	10.44	14	14	16	22	25
	KU 208162		Cameroon: Moloundou	F		29.93	3.78	6.88	8.02	17.71	6.65	2.26	12.85	10.66	12	13	16	23	19
	KU 208163		Cameroon: Moloundou	F		28.96	3.61	6.76	7.32	16.82	6.37	2.47	12.05	10.76	13	13	15	19	20
	KU 208164		Cameroon: Moloundou												14	15	21	24	20
	KU 208165		Cameroon: Moloundou	F?		28.3	3.64	6.34	7.56	17.12	6.24	2.17	12.11	10.52	13	12	17	21	23
	KU 208166		Cameroon: Moloundou												12	14	18	20	20
	KU 208167		Cameroon: Moloundou	F		30.28	3.61	7.15	8.6	16.16	7.16	2.59	12.97	10.38	13	12	19	21	22
	KU 208168		Cameroon: Moloundou												14	14	18	22	19
	KU 208169		Cameroon: Moloundou												10	14	14	23	23
	KU 208170		Cameroon: Moloundou	?		27.34	3.75	6.48	7.15	16.67	6.3	2.35	11.92	10.26	12	13	16	21	21
	KU 208171		Cameroon: Moloundou	M		26.03	3.51	6.32	6.89	14.8	6.11	2.26	11.07	9.35	13	13	18	20	20
	KU 208172		Cameroon: Moloundou												12	12	14	22	18
	KU 208173		Cameroon: Moloundou	F		29.07	3.79	6.82	7.93	16.56	6.27	2.46	12.71	10.01	12	11	17	21	20
	KU 208174		Cameroon: Moloundou	F		28.66	3.74	6.53	8.15	15.99	6.16	2.33	11.91	11.53	12	12	18	21	21
	KU 208175		Cameroon: Moloundou	F		29.32	3.93	7.46	8.29	17.18	6.8	2.34	13.06	10.03	15	13	21	22	21
	KU 208176		Cameroon: Moloundou												13	14	17	24	21
	KU 208177		Cameroon: Moloundou												11	13	15	22	19
	KU 208178		Cameroon: Moloundou	F?		28.46	3.89	6.76	7.75	16.3	6.62	2.23	12.42	10.2	13	11	18	23	19
	KU 208179		Cameroon: Moloundou	F		28.28	3.67	6.38	7.82	17.25	6.28	2.6	13.19	10.84	14	12	16	22	21
	KU 208180		Cameroon: Moloundou	F		26.88	3.65	6.55	7.33	16.55	6.58	2.27	11.74	10.2	13	13	18	20	23
	KU 208181		Cameroon: Moloundou	F?		27.2	3.64	6.73	7.48	15.87	6.16	2.43	12.01	9.55	12	12	18	22	22
	KU 208182		Cameroon: Moloundou	F?		27.83	3.61	6.56	7.25	16.44	6.59	2.46	11.73	10.66	11	12	19	20	18
	KU 208183		Cameroon: Moloundou	F		26.7	4.04	6.47	7.4	13.15	6.33	2.47	10.85	9.4	13	12	18	20	21
	KU 208184		Cameroon: Moloundou	F		28.16	3.72	6.84	7.76	15.23	6.37	2.48	12.03	9.92	12	11	18	20	18
	KU 208185		Cameroon: Moloundou	F		29.48	3.98	6.96	8.22	17.49	6.63	2.28	12.75	10.91	14	13	20	22	22
	NMP6V 74703/5	VG10-151	Cameroon: Mambele	M
	NMP6V 74703/6	VG10-152	Cameroon: Mambele	M
	NMP6V 74715/1	VG10-190	Cameroon: Malapa	M
	NMP6V 74723/1	VG10-201	Cameroon: Kika	M?
	NMP6V 74735/1	VG10-223	Cameroon: Mbimbé	M?
	no voucher	Xen110	Cameroon: Moloundou	F		49	5.2	10.4	12.7	29.4	9.3	3.6	15.9	18.9
	no voucher	Xen111	Cameroon: Moloundou	M		36.5	3.9	7.3	9.3	21.8	6.7	2.9	13.2	14.6
	no voucher	Xen112	Cameroon: Moloundou	F		47.6	3.9	9.1	11	25.3	7.9	3.3	13.7	16.1
	no voucher	Xen113	Cameroon: Moloundou	M		35.2	3.5	8.2	9.4	20.3	7.2	2.3	10.4	13.4
	no voucher	Xen114	Cameroon: Moloundou	F		46.5	3.9	9.1	11	24.9	7.3	3	13.5	15.9
	no voucher	Xen115	Cameroon: Moloundou	M		34.1	3.1	7.6	8.1	20.6	6.1	2.4	10.9	13.8
	no voucher	Xen116	Cameroon: Moloundou	F		45	4.2	9.1	11	25.5	7.9	3.3	13.8	15.3
	no voucher	Xen117	Cameroon: Moloundou	M		33.7	2.9	7.8	8.8	22.9	6.7	2	12.3	15.3
	no voucher	Xen118	Cameroon: Moloundou	F		36.6	3.3	7.8	9.5	21.4	6.5	2.3	11.9	13.1
	no voucher	Xen119	Cameroon: Moloundou	M		37.1	3.5	8.2	9.5	20.2	7.1	2.5	10.5	13.4
	no voucher	Xen120	Cameroon: Moloundou	F		46.3	3.7	9.8	10.5	22.3	8.1	2.5	12.3	15.1
	no voucher	Xen121	Cameroon: Moloundou	M		33.1	3.6	7.9	7.7	19.8	6.2	2.5	10.6	13.7
	no voucher	Xen122	Cameroon: Moloundou	M		32.5	3.1	7.9	8.5	19.6	6.5	2.3	10.2	13.1
	no voucher	Xen123	Cameroon: Moloundou	M		34	3.4	7.3	7.6	20.1	6.2	2.4	10.9	13.6
	no voucher	Xen124	Cameroon: Moloundou	M		31.9	3.1	8	8.3	19.2	6.3	2	9.9	13.6
	no voucher	Xen125	Cameroon: Moloundou	M		33.6	3.7	7.6	8.5	21.7	6.7	2.3	11.3	13.8
	no voucher	Xen126	Cameroon: Moloundou	F		44.7	3.8	9.2	10.7	22.5	8.1	2.8	11.7	14.3
	no voucher	Xen127	Cameroon: Moloundou	F		45.4	4.1	9.5	10.8	22.7	8.1	2.5	11.5	14
	no voucher	Xen128	Cameroon: Moloundou	F		44.8	4	9.6	11.1	23.2	8.1	2.8	10.6	15.1
	no voucher	Xen129	Cameroon: Moloundou	F		47.1	4.4	9.6	11.2	23.3	8.2	2.7	10.6	14.7
	aveF	maxF	stdevF	countF	aveM	maxM	stdevM	countM	aveALL	maxALL	stdevALL	countALL			12.7419	12.7742	17.1935	21.5484	20.5806
	35.8716	52.52	9.08573	31	33.8254	37.1	2.85445	13	35.0909	52.52	7.79581	45			16	15	21	25	25
															10	11	14	18	17
															31	31	31	31	31
X. cf. boumbaensis
	lost voucher (MHNG)	AMNH17279	Cameroon: Yaounde	M		37.3	3.8	8.8	9.6	20.2	6.3	2.3	10.6	13.5
	MHNG 2645.082	AMNH17280	Cameroon: Yaounde	F		43.5	3.8	9.1	10	19.6	7	2.1	11.4	13.4
	MHNG 2645.083	AMNH17281	Cameroon: Yaounde	M		35.5	3.8	8.7	9.5	18.5	6.6	2.4	10.4	13.1
	MHNG 2645.084	AMNH17282	Cameroon: Yaounde	F		45	4.4	9.2	10.1	18	7	2.2	10.4	13.8
	no voucher	Xen130	Cameroon: Yaounde	F		42.8	3.7	8.5	9.2	17.5	6.1	2.2	9.5	12.1
	no voucher	Xen143	Cameroon: Yaounde	F		46.9	4.7	9.9	10.9	22.9	7.4	2.7	12.3	15.3
	no voucher	Xen144	Cameroon: Yaounde	F		44.5	4.4	9.7	10.3	23.2	7.1	2.6	12	15.4
	no voucher	Xen145	Cameroon: Yaounde	F		43.2	4.9	9.7	10.5	22.2	6.9	2.5	11.9	14.3
	no voucher	Xen146	Cameroon: Yaounde	F		46.9	5.2	9.8	11.1	23.5	7.3	2.8	12.2	14.7
	no voucher	Xen147	Cameroon: Yaounde	F		47.3	4.7	9.5	10.3	23.1	7.1	2.8	12	14.6
	no voucher	Xen148	Cameroon: Yaounde	F		42.9	4.3	9.3	10.1	21.8	7.2	2.9	11	13.7
	no voucher	Xen149	Cameroon: Yaounde	F		44.2	4.5	9.6	10.7	23.2	7.4	2.8	11.9	15.9
	no voucher	Xen150	Cameroon: Yaounde	F		47.6	5.1	10	11.5	23.3	7.2	2.7	12.3	15.2
	no voucher	Xen131	Cameroon: Yaounde	M		35.9	3.6	8.1	8.2	19.5	6.3	2.1	9.8	13.1
	no voucher	Xen132	Cameroon: Yaounde	M		35.2	3.3	8.1	9.3	19.3	7.1	2.4	9.7	13.1
	no voucher	Xen133	Cameroon: Yaounde	M		32.3	2.9	7.3	7.8	17.8	5.9	2.1	9.5	12.6
	no voucher	Xen134	Cameroon: Yaounde	M		33.5	3.8	8	8.3	17.4	6	2.3	9.8	12
	no voucher	Xen135	Cameroon: Yaounde	M		34.3	3.2	7.9	8.8	17.7	6.9	2.2	9.4	12.2
	no voucher	Xen136	Cameroon: Yaounde	M		35.6	4.1	8.4	9	18.4	6.1	2.3	9.4	12
	no voucher	Xen137	Cameroon: Yaounde	M		33.4	3.4	7.9	8.1	17.7	5.8	2.1	9	12.4
	no voucher	Xen138	Cameroon: Yaounde	M		35.4	3.8	8.7	9.9	19.3	6.6	2.3	10	12.7
	no voucher	Xen139	Cameroon: Yaounde	M		34.2	3.4	8.2	9.2	19.4	6.6	2.4	9.2	13.8
	no voucher	Xen140	Cameroon: Yaounde	M		34.3	3.7	8.6	8.8	18.2	6.9	2.1	9.7	12.9
	no voucher	Xen141	Cameroon: Yaounde	M		36.3	4.1	8.5	9	18.5	6.3	2.2	9.6	13.2
	no voucher	Xen142	Cameroon: Yaounde	M		33.8	3.7	7.9	8.8	17.5	6.2	2.1	9.5	12.6
species	aveF	maxF	stdevF	countF	aveM	maxM	stdevM	countM	aveALL	maxALL	stdevALL	countALL
cf.boumbaensis	44.9818	47.3	3.7885	11	34.7857	37.3	1.33351	14	39.272	47.6	5.39448	25
X. eysoole
	MCZ A-138016	A-34586	Cameroon: Elak Oku	F	HOLOTYPE	39.07	5.23		10.27		8.41	2.51	16.43	14.98	14	11	20	23	17
	MCZ A-138017	A-34586	Cameroon: Elak Oku	F	PARATYPE	37.37	5.39	8.64	10.6	23.74	8.7	2.68	16.87	13.88	13	11	20	20	18
	MCZ A-148094	BJE3217	Cameroon: Nkambe	M	PARATYPE	41.71	5.59		11.56		8.17	2.74	17.18	16.38	13	10	21	18
	MCZ A-148095	BJE3218	Cameroon: Nkambe	F	PARATYPE	51.72	6.49		13.55		10.53	3.47	20.33	17.25	10	10	20	19	13?
	MCZ A-148096	BJE3219	Cameroon: Nkambe	F		50.69	6.57		14.04		9.29	3.66	21.09	17.71	12	13	18	20	13
	MCZ A-148097	BJE3220	Cameroon: Nkambe	F		51.12	6.98		13.97		9.83	3.87	21.44	16.4	12	13	23	21
	MCZ A-148098	BJE3221	Cameroon: Nkambe	F		49.93	5.95		13.6		9.85	3.32	20	16.54	13	10	23	20	14?
	MCZ A-148099	BJE3222	Cameroon: Nkambe	M		38.51	5.52		10.49		7.22	2.53	16.62	15.72	13	9	19	20
	MCZ A-148127	DMP580	Cameroon: Bamenda	F	PARATYPE	51.45	5.96		13.15		9.62	3.54	20.37	12.35	12	10	20	23	13?
	MCZ A-148128	DMP590	Cameroon: Bamenda	F	PARATYPE	47.45	6.1		12.51		8.72	3.29	19.35	15.96	12	10	19	22
	MCZ A-148129	DMP591	Cameroon: Bamenda	M	PARATYPE	39.11	5.23		11.24		8.12	2.87	16.9	11.13	13	10	19	21
	MCZ A-148130	DMP592	Cameroon: Bamenda	M	PARATYPE	40.98	5.07		11.35		8.98	2.93	17.66	15.28	13	10	17	20
	MCZ A-148131	DMP593	Cameroon: Bamenda	F	PARATYPE	49.6	5.46		13.27		9	3.06	18.97	16.39	13	11	18	18	14
	MCZ A-148068	BJE3175	Cameroon: Elak Oku	tadpole
	no voucher	BJE3176	Cameroon: Elak Oku
	no voucher	BJE3177	Cameroon: Elak Oku
	no voucher	BJE3178	Cameroon: Elak Oku	tadpole
	no voucher	BJE3179	Cameroon: Elak Oku
	NMP6V 74555	VG10-07	Cameroon: Babungo	F	PARATYPE
	NMP6V 74745/1	VGCM12-01	Cameroon: Njikwa Acha Tugi Mts	F	PARATYPE
	NMP6V 74745/2	VGCM12-02	Cameroon: Njikwa Acha Tugi Mts	F	PARATYPE
	aveF	maxF	stdevF	countF	aveM	maxM	stdevM	countM	aveALL	maxALL	stdevALL	countALL			12.5385	10.6154	19.7692	20.3846	15.5
	47.6	51.72	5.48407	9	40.0775	41.71	1.51357	4	45.2854	51.72	5.80358	13			14	13	23	23	18
															10	9	17	18	13
															13	13	13	13	4
X. fraseri
	BMNH 1947.2.24.78		Southern Benin or SW Nigeria	M?	LECTOTYPE	37.18	5.12	8.73	11.47	28.39	8.14	2.82	18.39	15.5	13	13	21	21	24
	BMNH 1947.2.24.79		Southern Benin or SW Nigeria	M?	PARALECTOTYPE	32.45	4.44	7.56	8.98	22.73	7.57	2.78	20.52	12.27		15	21	25
	aveF	maxF	stdevF	countF	aveM	maxM	stdevM	countM	aveALL	maxALL	stdevALL	countALL			13	14	21	23	24
	-	-	-	-	34.815	37.18	3.34462	2	34.815	37.18	3.34462	2			13	15	21	25	24
															13	13	21	21	24
															1	2	2	2	1
X. cf. fraseri
	CAS 146198		Ghana: Wa												12	13	27	28	25
X. itombwensis
	MCZ A-138192	BJE 275	DRC: Itombwe Plateau	M	HOLOTYPE	31.53	3.98	7.02	9.44	21.95	7.28	2.5	14.05	13.15
	no voucher	Live_1	DRC: Itombwe Plateau	M		31.5	3.27	7.76	7.87		7.13	2.26	0	12.96
	no voucher	Live_10	DRC: Itombwe Plateau	M		31.48	3.17	8.15	7.86		6.77	1.99	0	12.1
	no voucher	Live_11	DRC: Itombwe Plateau	M		37.43	4.2	8.97	9.32		7.62	2.86	0	15.34
	no voucher	Live_12	DRC: Itombwe Plateau	F		37.86	3.54	9.08	8.79		7.47	2.82	0	14.1
	no voucher	Live_13	DRC: Itombwe Plateau	F		33.48	3.45	8.59	8.71		6.49	2.39	0	12.52
	no voucher	Live_2	DRC: Itombwe Plateau	M		27.87	2.85	7.72	8.06		5.98	1.83	0	11.84
	no voucher	Live_3	DRC: Itombwe Plateau	M		30.88	3.86	8.48	8.37		8.22	2.54	0	13.71
	no voucher	Live_4	DRC: Itombwe Plateau	M		29.9	3.64	8.01	7.64		6.33	2.2	0	13.01
	no voucher	Live_5	DRC: Itombwe Plateau	M		30.44	3.66	7.97	8.37		6.89	2.33	0	13.81
	no voucher	Live_6	DRC: Itombwe Plateau	M		29.23	3.28	7.25	8.27		6.04	1.97	0	12.11
	no voucher	Live_7	DRC: Itombwe Plateau	M		30.01	3.28	7.88	7.93		6.95	2.45	0	13.4
	no voucher	Live_8	DRC: Itombwe Plateau	M		31.79	3.36	7.81	9.61		6.69	2.17	0	13.73
	no voucher	Live_9	DRC: Itombwe Plateau	M		29.57	3.22	7.99	8.55		7.05	2.48	0	12.63
	aveF	maxF	stdevF	countF	aveM	maxM	stdevM	countM	aveALL	maxALL	stdevALL	countALL
	35.67	37.86	3.09713	2	30.9692	37.43	2.33961	12	31.6407	37.86	2.87811	14
X. kobeli
	MCZ A-148037	BJE3075	Cameroon: Meganme	F	HOLOTYPE	42.1	5.77	9.19	12	25.37	8.7	3.12	18.63	15.55	11	11	14	16
	MCZ A-148035	BJE3072	Cameroon: Meganme	M	PARATYPE	34.94	4.57	7.61	8.91	20.23	7.67	2.29	15.06	12.46	11	10	16	16
	MCZ A-148036	BJE3074	Cameroon: Meganme	F	PARATYPE	42.65	5.28	8.48	11.65	25.59	8.62	2.57	17.71	14.89	12	10	16	17	13
	MCZ A-148038	BJE3076	Cameroon: Meganme	F	PARATYPE	44.85	4.91	8.18	11.29	23.91	8.86	3.16	18.49	15.02	13	10	16	19
	MCZ A-148039	BJE3077	Cameroon: Meganme	F	PARATYPE	40.35	5.53	8.86	10.63	25.27	8.72	2.48	17.88	15.68	11	10	15	18	13
	MCZ A-148059	BJE3151	Cameroon: Balaoungao	F	PARATYPE	43.54	5.52	9.14	11.65	24.4	8.74	2.5	17.56	14.77	12	11	17	22	14
	MCZ A-148060	BJE3152	Cameroon: Balaoungao	M	PARATYPE	33.44	4.45	7.76	8.96	21.11	7.53	2.41	14.49	14.08	11		15	20
	MCZ A-148061	BJE3153	Cameroon: Balaoungao	M	PARATYPE	35.42	4.58	7.56	8.76	19.77	7.41	2.12	15.1	13.41	12	10	16	20
	MCZ A-148062	BJE3154	Cameroon: Balaoungao	M	PARATYPE	37.93	4.73	8.11	9.73	23	7.79	2.56	16.82	14.69	14		18	21
	MCZ A-148063	BJE3155	Cameroon: Balaoungao	F	PARATYPE	46.61	5.63	9.29	12.36	25.12	10.67	2.91	18.97	16.25	13	12	16	21	21
	MCZ A-148065	BJE3166	Cameroon: Ngingdom Coc	M	PARATYPE	33.35	4.54	7.57	8.92	19.89	6.98	1.82	14.79	13.55	13		16	20
	MCZ A-148066	BJE3167	Cameroon: Ngingdom Coc	M	PARATYPE	33.68	4.69	8.28	9.45	21.58	8.1	2.27	14.94	14.24	11	12	19	21
	NMP6V 74714/1	VG10-188	Cameroon: Est Region: Malapa	M	PARATYPE
	CAS 249997	BJE3157	Cameroon: Balaoungao
	tadpole; no voucher	BJE3095	Cameroon: Meganme
	voucher at MCZ or CAS	BJE3073	Cameroon: Meganme
	CAS 249964	BJE3071	Cameroon: Meganme
	CAS 253767	DMP-1227	Cameroon: Ouest Region
	CAS 253768	DMP-1228	Cameroon: Ouest Region	F		36.22	4.83	7.79	10.19	21.58	7.89	2.49	16.27	13.22
	CAS 253769	DMP-1229	Cameroon: Ouest Region	M		38.4	4.86	8.1	9.59	24.33	8.09	2.64	16.39	14.37
	CAS 253770	DMP-1230	Cameroon: Ouest Region
	aveF	maxF	stdevF	countF	aveM	maxM	stdevM	countM	aveALL	maxALL	stdevALL	countALL			12	10.6667	16.1667	19.25	15.25
	42.3314	46.61	3.35511	7	35.3086	38.4	2.10384	7	38.82	46.61	4.52956	14			14	12	19	22	21
															11	10	14	16	13
															12	9	12	12	4
X. lenduensis
	MCZ A-139853	BJE2957	Lendu, DRC	M	HOLOTYPE	37.69	5.22				8.43	2.9	16.61	14.62
		BJE2882	Lendu, DRC	F		53.14	5.39				10.32	3.99	18.24	15.19
		BJE2885	Lendu, DRC	F		49.36	4.89				9.47	3.51	19.03	13.62
		BJE2887	Lendu, DRC	F		41.1	4.51				8.77	3.11	17.75	15.11
		BJE2888	Lendu, DRC	F		48.08	4.8				9.12	3.67	19.17	14.86
		BJE2890	Lendu, DRC	F		41.21	4.61				8.5	2.68	16.96	14.1
		BJE2920	Lendu, DRC	F		53.68	4.6				11.02	4.1	19.73	16.56
		BJE2921	Lendu, DRC	F		49.38	5.22				9.78	3.45	19.96	15.12
		BJE2922	Lendu, DRC	F		56.43	5.37				9.95	4.05	19.14	15.78
		BJE2923	Lendu, DRC	F		48.8	3.89				10.41	3.75	19.49	16.15
		BJE2929	Lendu, DRC	F		54.47	4.64				9.96	4.36	19.6	16.93
		BJE2930	Lendu, DRC	F		54.5	5.15				9.53	3.93	19.09	16.13
		BJE2933	Lendu, DRC	F		50.92	4.73				9.87	3.64	18.34	13.51
		BJE2934	Lendu, DRC	F		46.4	4.8				9.76	3.27	17.58	14.63
		BJE2935	Lendu, DRC	F		49.76	4.7				9.39	3.49	17.99	14.12
		BJE2939	Lendu, DRC	F		50.31	4.45				9.9	3.55	18.91	16.13
		BJE2940	Lendu, DRC	F		50.07	4.79				10.12	4.04	20.22	15.7
		BJE2944	Lendu, DRC	F		38.01	4.25				8.1	3.81	14.87	13.44
		BJE2947	Lendu, DRC	F		48.33	4.74				9.6	2.81	15.18	14.67
		BJE2948	Lendu, DRC	F		44.42	4.79				9.39	3.38	16.9	14.3
		BJE2949	Lendu, DRC	F		53.38	4.77				10.78	4.84	20.48	16.82
		BJE2950	Lendu, DRC	F		54.38	4.47				9.64	4.12	20.14	15.88
		BJE2958	Lendu, DRC	F		46.41	4.33				8.75	3.81	18.29	15.22
		BJE2967	Lendu, DRC	F		42.06	4.45				9.12	3.19	17.64	16.57
		BJE2970	Lendu, DRC	F		50.57	4.46				8.96	3.66	17.34	14.5
		BJE2971	Lendu, DRC	F		40.23	4.44				9.15	3.23	18.17	15.49
		BJE2972	Lendu, DRC	F		42.56	3.81				8.67	3.42	16.98	15.38
		BJE2973	Lendu, DRC	F		40.77	4.13				8.42	3.27	17.78	15.3
		BJE2883	Lendu, DRC	M		39.91	4.39				8.67	2.95	17.55	14.66
		BJE2884	Lendu, DRC	M		46.02	3.99				7.24	3.12	17.08	13.82
		BJE2886	Lendu, DRC	M		42.1	4.18				8.03	3.22	13.64	14.05
		BJE2936	Lendu, DRC	M		40.37	4.27				8.78	2.86	16.69	15.36
		BJE2941	Lendu, DRC	M		39.76	4.01				9.22	3.08	16.38	14.37
		BJE2942	Lendu, DRC	M		39.81	3.89				8.33	2.75	16.42	13.49
		BJE2943	Lendu, DRC	M		43.67	4.61				8.19	3.16	17.8	14.77
		BJE2945	Lendu, DRC	M		38.05	3.8				8.38	2.76	16.8	14.29
		BJE2946	Lendu, DRC	M		38.66	4.04				8.4	3.11	16.81	14.93
		BJE2951	Lendu, DRC	M		40.8	4.23				8.15	3.51	16.39	14.39
		BJE2953	Lendu, DRC	M		41.93	4.13				10.07	2.77	17.72	14.79
		BJE2954	Lendu, DRC	M		42.74	4.18				8.88	3.93	18.42	16.3
		BJE2968	Lendu, DRC	M		35.76	4.09				7.32	3.54	15.68	14.18
		BJE2969	Lendu, DRC	M		36.49	4.17				8.28	2.87	16.43	14.52
	aveF	maxF	stdevF	countF	aveM	maxM	stdevM	countM	aveALL	maxALL	stdevALL	countALL
	48.1011	56.43	5.20551	27	40.2507	46.02	2.75836	15	45.2974	56.43	5.85461	42
X. longipes
	MHNG 2497.10		Cameroon: Lake Oku	F	HOLOTYPE	33.98	4.18	7.89	8.93	22.27	6.77	2.13	12.33	12.07	12		13	16
	MHNG 2496.76		Cameroon: Lake Oku	F	PARATYPE	30.87	4	7.02	7.81	19.25	6.17	1.92	11.56	11.05	11	9	13	19	17
	MHNG 2496.77		Cameroon: Lake Oku	F	PARATYPE	28.68	4.86	7.31	8.58	18.72	6.24	2.07	10.9	10.18
	MHNG 2496.94		Cameroon: Lake Oku	F	PARATYPE	30.49	3.71	7.49	8.63	19.81	5.92	1.95	11.43	9.95	10	10	13	21	14?
	MHNG 2496.95		Cameroon: Lake Oku	F	PARATYPE	31.7	3.85	7.5	8.18	18.9	6.3	2.34	11.62	10.94	11	8	13	21
	MHNG 2496.96		Cameroon: Lake Oku	F	PARATYPE	31.01	4.02	7.87	8.96	20.37	7.29	2.32	11.76	11.64	11	8	8	17
	MCZ A-148070	BJE3188	Cameroon: Lake Oku	M		26.28	3.62		7.33		6.1	2.19	10.86	9.65	10		12	16
	MCZ A-148071	BJE3189	Cameroon: Lake Oku	F		28.84	3.75		8.7		6.14	1.91	10.16	9.79	12		15	15
	MCZ A-148072	BJE3190	Cameroon: Lake Oku	F		28.43	3.2		8.64		6.42	2.69	10.86	11.27	12		14	17
	MCZ A-148073	BJE3191	Cameroon: Lake Oku	M		26.65	4.01		8.23		6.23	2.45	10.83	10.94
	MCZ A-148074	BJE3192	Cameroon: Lake Oku	M		29.17	4.12		8.28		6.19	2.36	9.88	9.61
	MCZ A-148075	BJE3193	Cameroon: Lake Oku	M		27.06	4.42		7.94		5.79	2.3	10.68	9.82	11		16	15
	MCZ A-148076	BJE3194	Cameroon: Lake Oku	M		26.55	4.65		8.11		6.25	2.17	9.66	9.59	13		13	14
	MCZ A-148077	BJE3195	Cameroon: Lake Oku	M		25.66	3.6		7.99		5.66	2.46	10.02	10.16
	MCZ A-148078	BJE3196	Cameroon: Lake Oku	M		25.87	4.04		8.32		5.7	2.11	9.82	9.32	12		16	17
	MCZ A-148079	BJE3197	Cameroon: Lake Oku	F		27.88	3.61		8.43		6.21	2.15	10.32	10.53
	MCZ A-148080	BJE3198	Cameroon: Lake Oku	M		24.53	3.93		7.58		5.43	1.92	9.34	9.54
	AMNH A168447	BJE238	Cameroon: Lake Oku
	AMNH A168448	BJE239	Cameroon: Lake Oku
	AMNH A168449	BJE244	Cameroon: Lake Oku
	AMNH A168450	BJE245	Cameroon: Lake Oku
	AMNH A168452	BJE247	Cameroon: Lake Oku
	AMNH A168453	BJE248	Cameroon: Lake Oku
	AMNH A168454	BJE249	Cameroon: Lake Oku
	AMNH A168455	BJE250	Cameroon: Lake Oku
	AMNH A168457	BJE252	Cameroon: Lake Oku
	AMNH A168458	BJE253	Cameroon: Lake Oku
	CAS 253686	DMP-657	Cameroon: Lake Oku
	CAS 253687	DMP-658	Cameroon: Lake Oku
	CAS 253688	DMP-659	Cameroon: Lake Oku
	CAS 253689	DMP-660	Cameroon: Lake Oku
	CAS 253690	DMP-661	Cameroon: Lake Oku
	CAS 253691	DMP-662	Cameroon: Lake Oku
	CAS 253692	DMP-663	Cameroon: Lake Oku
	CAS 253693	DMP-664	Cameroon: Lake Oku
	CAS 253695	DMP-666	Cameroon: Lake Oku
	CAS 253696	DMP-667	Cameroon: Lake Oku
	CAS 253697	DMP-668	Cameroon: Lake Oku
	CAS 253698	DMP-669	Cameroon: Lake Oku
	CAS 253699	DMP-670	Cameroon: Lake Oku
	CAS 253700	DMP-671	Cameroon: Lake Oku
	CAS 253701	DMP-672	Cameroon: Lake Oku
	CAS 253702	DMP-673	Cameroon: Lake Oku
	CAS 253703	DMP-674	Cameroon: Lake Oku
	CAS 253704	DMP-675	Cameroon: Lake Oku
	CAS 253705	DMP-676	Cameroon: Lake Oku
	CAS 253706	DMP-677	Cameroon: Lake Oku
	CAS 253707	DMP-678	Cameroon: Lake Oku
	CAS 253709	DMP-680	Cameroon: Lake Oku
	aveF	maxF	stdevF	countF	aveM	maxM	stdevM	countM	aveALL	maxALL	stdevALL	countALL			11.3636	8.75	13.2727	17.0909	17
	30.2089	33.98	1.94943	8	26.4713	29.17	1.33592	8	28.45	33.98	2.52564	17			13	10	16	21	17
															10	8	8	14	17
															11	4	11	11	1
X. parafraseri
	MCZ A-148034	BJE3068	Cameroon: Centre Region	F	HOLOTYPE	40.71	4.71	8.05	9.89	22.86	8.22	2.36	16.19	13.79
	CAS 253332	DCB-294	Cameroon: Est Region	F	PARATYPE	32.04	3.81	6.65	8.57	22.72	6.86	1.82	14.65	13.23
	CAS 253333	DCB-295	Cameroon: Est Region	F	PARATYPE	38.07	4.53	7.61	10.04	23.79	7.46	2.34	16.79	13.39
	CAS 253366	DCB-329	Cameroon: Est Region		PARATYPE
	CAS 253367	DCB-330	Cameroon: Est Region	?	PARATYPE	29.66	3.56	5.77	7.68	19.58	6.31	1.78	19.35	10.72
	CAS 253368	DCB-331	Cameroon: Est Region	?	PARATYPE	31.21	3.97	7.2	8.53	20.83	6.65	2.21	14.62	12.62
	CAS 253369	DCB-332	Cameroon: Est Region		PARATYPE
	CAS 253370	DCB-333	Cameroon: Est Region		PARATYPE
	CAS 253766	DCB-279	Cameroon: Est Region	tadpole
	MCZ A-148027	BJE3061	Cameroon: Centre Region	F	PARATYPE	39.73	4.43	7.87	9.02	21.07	7.51	2.19	15.17	11.75
	MCZ A-148028	BJE3062	Cameroon: Centre Region	M(NUPTIAL)	PARATYPE	31.38	4.23	7.19	8.43	19.04	7.17	2.29	14.03	12.45	12	10	16	17
	MCZ A-148029	BJE3063	Cameroon: Centre Region	F	PARATYPE	37.37	4.63	7.55	9.26	21.46	7.34	2.01	15.71	13.22	11	8	14	17
	MCZ A-148030	BJE3064	Cameroon: Centre Region	M	PARATYPE	30.35	4.18	6.82	7.86	19.2	6.68	1.91	14.5	11.82	10	9	16	17
	MCZ A-148031	BJE3065	Cameroon: Centre Region	F	PARATYPE	40.2	4.62	7.87	9.68	17.1	7.89	2.74	16.05	14.06	11	11	17	17	14
	MCZ A-148032	BJE3066	Cameroon: Centre Region	F	PARATYPE	33.79	4.24	7.62	8.35	20.04	6.71	2.05	15.25	12.93	12	10	15	20	8?
	MCZ A-148033	BJE3067	Cameroon: Centre Region	M(NUPTIAL PADS)	PARATYPE	31.23	4.05	6.48	7.55	18.63	6.73	2.04	13.63	12.84	13		15	19
	NCSM 78872	BLS 14751	Gabon: Ogooué-Ivindo	?	PARATYPE	32.9	3.8	7	8.8	19.32	6.83	2.7	14.53	12.35	11	12	15	19	17
	NCSM 78877	BLS 14872	Gabon: Ogooué-Ivindo	?	PARATYPE	28.91	3.77	6.4	8.11	16.48	5.95	2.17	13.69	11.24	11	10	15	17
	NCSM 78878	BLS 14873	Gabon: Ogooué-Ivindo	F?	PARATYPE	33.5	4.67	7.32	9.59	21.28	6.96	2.27	15.3	13.23	10	10	18	16
	NMP6V 74556/1	VG09-070	Cameroon: Ebogo	F	PARATYPE
	MCZ A-148034	BJE3068	Cameroon: Centre Region												11	10	19	17	14
	CAS 249961	BJE3060	Cameroon: Centre Region
	CAS 153581		Cameroon: Sud Region: Avundi												10	10	16	19
	CAS 153582		Cameroon: Sud Region: Avundi														17	18	17
	CAS 153583		Cameroon: Sud Region: Avundi												9	11	16	20	15
	CAS 153584		Cameroon: Sud Region: Avundi												10	11	16	18	15
	CAS 153585		Cameroon: Sud Region: Avundi												9		17	18	16
	CAS 153586		Cameroon: Sud Region: Avundi												11	11	16	19
	CAS 153587		Cameroon: Sud Region: Avundi												12	10	16	17	16
	CAS 153588		Cameroon: Sud Region: Avundi													10	11	17
	CAS 153589		Cameroon: Sud Region: Avundi												10	10	12	18	17
	CAS 153590		Cameroon: Sud Region: Avundi												12	10	18	20
	CAS 153591		Cameroon: Sud Region: Avundi												10	10	18	16	17
	CAS 153592		Cameroon: Sud Region: Avundi												12	11	17	19	18
	CAS 153593		Cameroon: Sud Region: Avundi												10	10	14	18	15
	CAS 153594		Cameroon: Sud Region: Avundi												10	11	14	16	16
	CAS 153595		Cameroon: Sud Region: Avundi												10	11	15	18	15
	CAS 153596		Cameroon: Sud Region: Avundi												10	11	15	18	17
	CAS 153597		Cameroon: Sud Region: Avundi												9	11	14	19	16
	CAS 153598		Cameroon: Sud Region: Avundi												9	11	18	20	19
	CAS 249961		Cameroon: Rd from Douala to Yaounde												11	11	17	19
	CAS 249964		Cameroon: Pond on Trail near Matt's Villa												11	10	11	15
	CAS 249996		Cameroon: Balaoungao												9	11	16	21
	CAS 249997		Cameroon: Balaoungao												11	10	17	21
	CAS 253589	DCB-572	Cameroon: Sud Region	F		40.96	5.01	8.49	9.16	24.93	7.6	2.49	17.22	13.08
	CAS 253590	DCB-573	Cameroon: Sud Region	F		41.81	5.27	9.01	10.71	24.72	7.93	2.4	17.34	13.42
	CAS 253591	DCB-574	Cameroon: Sud Region	M		33.05	3.82	7.02	9.03	21.6	6.82	2.15	14.37	13.36
	CAS 253609	DCB-595	Cameroon: Sud Region	F		38.4	4.41	7.69	10.01	24.9	7.43	2.4	17.51	13.66
	CAS 253766	DCB-279	Cameroon; Est Region
	NMP6V 75140/1	VGCG12-75	Congo Rep: Ndjoko	F
	NMP6V 75140/6	VGCG12-32	Congo Rep: Ndjoko	juvenile
	NMP6V 75140/7	VGCG12-70	Congo Rep: Ndjoko	juvenile
	NMP6V 75140/2	VGCG12-78	Congo Rep: Ndjoko	juvenile
	NMP6V 75140/3	VGCG12-66	Congo Rep: Ndjoko	juvenile
	NMP6V 75140/4	VGCG12-67	Congo Rep: Ndjoko	juvenile
	NMP6V 75140/5	VGCG12-68	Congo Rep: Ndjoko	juvenile
	NCSM 78874	BLS 14869	Gabon: Ogooué-Ivindo	?		30.34	3.8	6.8	7.89	18.23	6.64	2.18	13.71	12.19
	NCSM 78875	BLS 14870	Gabon: Ogooué-Ivindo	?		31.38	4.16	7.14	9.19	19.3	6.43	2.18	14.51	13.13
	NCSM 78876	BLS 14871	Gabon: Ogooué-Ivindo	?		28.25	3.8	6.72	7.76	19.09	6.69	2.33	13.74	12.26
	NCSM 78879	BLS 14874	Gabon: Ogooué-Ivindo	F?		33.6	4.08	6.89	9.25	21.02	7.03	2.37	15.36	11.86
	NCSM 78880	BLS 14875	Gabon: Ogooué-Ivindo	F?		35.16	4.38	7.38	9.59	18.45	7.51	2.63	15.2	12.86
	no voucher	x.fras.cr27	Cameroon: Yaounde
	aveF	maxF	stdevF	countF	aveM	maxM	stdevM	countM	aveALL	maxALL	stdevALL	countALL			10.5667	10.3793	15.6562	18.125	16.1176
	37.2543	41.81	3.22635	14	33.9333	38.4	4.09705	3	34.3333	41.81	4.23142	24			13	12	19	21	19
															9	8	11	15	14
															30	29	32	32	17
X. pygmaeus
	lost voucher (MHNG)	AMNH17321	Boende, DRC	F		30.9	3.4	7.3	7.5	16.8	5.7	2	9.9	10.8
	lost voucher (MHNG)	AMNH17323	Boende, DRC	F		35.7	4	8.2	7.9	20.2	5.8	1.9	11.2	12.2
	lost voucher (MHNG)	AMNH17320	Boende, DRC	M		27.1	3.3	7.5	7.4	16.4	5.6	1.7	9.8	11.2
	lost voucher (MHNG)	AMNH17322	Boende, DRC	M		28.3	3.5	7.4	7.7	7.3	4.8	2.1	10.5	11.5
	aveF	maxF	stdevF	countF	aveM	maxM	stdevM	countM	aveALL	maxALL	stdevALL	countALL
	33.3	35.7	3.39411	2	27.7	28.3	0.848528	2	30.5	35.7	3.81226	4
X. ruwenzoriensis
	MHNG 2238. 15		Uganda:Semiliki forest	F	LECTOTYPE	37.1	4.43	7.59	9.32	21.97	6.79	2.46	15.95	12.34	11	10	18	19	18
	MHNG 2238. 18		Uganda:Semiliki forest	F	PARALECTOTYPE	39.52	4.54	7.26	9.74	20.66	7.73	2.7	15.36	12.15	11	11	14	17
	MHNG 2238. 19		Uganda:Semiliki forest	m?	PARALECTOTYPE	37.55	4.15	8.07	8.37	19.54	7.14	2.72	16.11	13.33	14	12	17	19	22
	MHNG 2238. 20		Uganda:Semiliki forest	F	PARALECTOTYPE	36.05	4.33	8.01	9.07	19.65	6.7	2.63	14.6	12.92	11	12	17	19	18
	KU 208479		Uganda:Semiliki forest	F?		34.21	4.42	8.66	9.52	20.28	7.85	2.21	15.33	13.57
	KU 216989		Uganda:Semiliki forest	M?		38.96	4.37	8.15	9.26	23.13	8	2.51	16.45	15.39
	KU 216990		Uganda:Semiliki forest	?		35.27	4.3	7.86	8.84	19.44	7.1	2.2	14.74	12.86
	KU 216991		Uganda:Semiliki forest	?		38.6	4.2	8.6	10.44	20.69	7.57	2.45	15.68	12.9
	KU 216992		Uganda:Semiliki forest	?		36.24	4.99	8.45	9.4	22.02	8.03	2.13	16.03	11.98
	KU 216993		Uganda:Semiliki forest	F?		37.83	4.47	8.9	9.68	19.76	8.16	2.21	16.65	13.64
	KU 216996		Uganda:Semiliki forest	?		44.26	4.38	9.23	11.15	20.58	8.07	2.73	17.15	12.34
	lost voucher (MHNG)	AMNH17317	Uganda:Semiliki forest	F		42.5	4.4	9.1	10.6	22.3	6.7	2.4	12.6	13.6
	lost voucher (MHNG)	AMNH17319	Uganda:Semiliki forest	F		48.2	4.4	10.1	10.3	21.4	7.2	2.1	13.3	14.5
	lost voucher (MHNG)	AMNH17316	Uganda:Semiliki forest	M		35.4	3.3	8.4	10	20.7	6.4	2.3	12.9	14.7
	lost voucher (MHNG)	AMNH17318	Uganda:Semiliki forest	M		35.8	3.7	9.2	10.1	19.5	6.4	2	11.4	13.8
	no voucher	Xen223	Uganda:Semiliki forest	M		36.8	3.1	8.7	9.8	21	6.9	2.5	10.9	14.5
	no voucher	Xen224	Uganda:Semiliki forest	M		35.2	3.2	8.7	9.2	21.9	5.9	2.5	12.1	14.1
	aveF	maxF	stdevF	countF	aveM	maxM	stdevM	countM	aveALL	maxALL	stdevALL	countALL			11.75	11.25	16.5	18.5	19.3333
	37.625	39.52	1.45937	4	36.6183	38.96	1.45259	6	38.2053	48.2	3.68266	17			14	12	18	19	22
															11	10	14	17	18
															4	4	4	4	3
X. vestitus
	no voucher	RT2	Uganda: Lake Mutanda
X. wittei
	MCZ A-140171	BJE2959	DRC: Kahusi Biega	F		48.96	5.19				10.33	4.66	19.05	16.51
	MCZ A-140172	BJE2960	DRC: Kahusi Biega	F		49.71	4.84				9.87	3.78	19.03	16.9
	MCZ A-140173	BJE2961	DRC: Kahusi Biega	F		51.05	4.8				10.1	4.68	18.41	16.98
	MCZ A-140174	BJE2962	DRC: Kahusi Biega	F		44.24	4.14				9.27	3.38	17.15	15.22
	MCZ A-140175	BJE2963	DRC: Kahusi Biega	F		40.87	3.8				8.56	2.97	17.79	15.54
	MCZ A-140176	BJE2964	DRC: Kahusi Biega	M		42.82	4.37				8.92	3.22	17.71	15.03
	MCZ A-140177	BJE2965	DRC: Kahusi Biega	M		40.83	3.88				9.15	3.78	16.69	13.87
	MCZ A-140178	BJE2966	DRC: Kahusi Biega	M		36.1	3.87				8.13	2.62	15.39	13.54
	MHNG 2644.062	AMNH17304	Uganda: Chelina	M		44.8	4.3	9.3	10.3	22.8	8.1	3.1	11.8	15.4
	MHNG 2645.091	AMNH17305	Uganda: Chelina	F		50.5	5.2	10.2	11.1	22.3	8.4	2.9	12.5	14.7
	MHNG 2645.092	AMNH17306	Uganda: Chelina	M		42.2	4.5	9.9	10	21.6	7.4	2.7	11.8	14.3
	MHNG 2645.093	AMNH17307	Uganda: Chelina	F		50.9	4.6	10.4	11.7	22.5	8.8	3	13.2	15.5
	CAS 201644	JVV4161	Uganda: Bwindi
	no voucher	RT1	Rwanda: Cyamudongo Forest
	no voucher	Xen183	Uganda: Chelina	F		48.3	4.3	9	10.1	23	7.3	3	12.5	15
	no voucher	Xen185	Uganda: Chelina	F		48.8	4.3	9.5	9.3	20.5	7.5	2.5	11.3	14.3
	no voucher	Xen187	Uganda: Chelina	F		53.5	5.4	10.6	11.6	24.3	8.3	3.1	13	15.2
	no voucher	Xen188	Uganda: Chelina	F		51	4.6	9.7	11.5	22.7	8.2	3.4	11.7	14
	no voucher	Xen189	Uganda: Chelina	F		49.9	5.4	9.9	11.4	23.2	8.3	3.3	11.1	15.7
	no voucher	Xen190	Uganda: Chelina	F		49.6	4.7	9.7	10.5	22.6	8	3	11.5	15
	no voucher	Xen191	Uganda: Chelina	F		49	4.8	10	10.4	21.9	7.1	2.8	10.7	13.5
	no voucher	Xen192	Uganda: Chelina	F		50.8	4.7	10.3	11.4	23.1	8.3	3.1	10.6	15.1
	no voucher	Xen194	Uganda: Chelina	F		46.9	4.1	9.6	10.3	20.9	7.7	3.1	11	13.6
	no voucher	Xen195	Uganda: Chelina	F		45.5	4.2	9.3	10.2	21.5	7.3	2.6	11.2	13.9
	no voucher	Xen184	Uganda: Chelina	M		44.2	4.1	9.8	10	21.9	7.8	2.9	11.2	15.1
	no voucher	Xen186	Uganda: Chelina	M		41.5	4.5	9.1	10	21.6	8.1	2.9	11.2	14.5
	no voucher	Xen193	Uganda: Chelina	M		45.1	4.6	9	10.1	21.8	7.2	2.6	10.9	14.8
	no voucher	Xen196	Uganda: Chelina	M		38.1	4	8.3	9.3	20.6	7.6	2.7	9.4	14.2
	no voucher	Xen197	Uganda: Chelina	M		38.2	3.7	8.1	9.1	19.2	6.8	2.8	10.6	14
	no voucher	Xen198	Uganda: Chelina	M		38	3.8	7.9	8.2	20.5	6.7	2.3	11.2	13.4
	no voucher	Xen199	Uganda: Chelina	M		42.4	4.2	9.2	10.3	20.8	8.1	3	10.7	14.4
	no voucher	Xen200	Uganda: Chelina	M		39.2	4	8.6	9.4	19.5	7	2.6	10.7	13.4
	no voucher	Xen201	Uganda: Chelina	M		37.6	3.7	8.6	9.5	18.7	7.4	2.7	10.3	13.5
	no voucher	Xen202	Uganda: Chelina	M		40.4	3.9	9.1	9.7	20.5	7.1	2.8	10	12.9
	aveF	maxF	stdevF	countF	aveM	maxM	stdevM	countM	aveALL	maxALL	stdevALL	countALL
	48.7959	53.5	3.00483	17	40.7633	45.1	2.8292	15	45.0306	53.5	4.98606	32
laevis group
X. gilli
	no voucher	jd(0-1)	South Africa: Western Cape Province	F		52.3	5.6		12.8		9.2	3.5		16.3
	no voucher	jd(0-2)	South Africa: Western Cape Province	F		60.8	6.1		14.3		9.3	3.8		18.3
	no voucher	jd(0-3)	South Africa: Western Cape Province	F		51.9	5		12.5		8.7	3.1		16.9
	no voucher	jd(1-0)	South Africa: Western Cape Province	F		51.4	5		12.9		8.6	3.6		16.8
	no voucher	jd(1-1)	South Africa: Western Cape Province	F		49.4	4.7		11.7		7.8	3.2		15.8
	no voucher	jd(2-0)	South Africa: Western Cape Province	F		57.3	4.8		13.5		9.2	3.7		17.1
	no voucher	jd(3-0)	South Africa: Western Cape Province	F		48.2	5.3		11.9		7.7	3		16.3
	no voucher	km(1)	South Africa: Western Cape Province	F		41.1	3.9		10.6		6.5	2.6		13
	no voucher	km(2)	South Africa: Western Cape Province	F		58.9	4.5		13.3		8.4	3.2		16.9
	no voucher	rg(0-1)	South Africa: Western Cape Province	F		49.6	5.3		12.4		7.9	3.3		15.8
	no voucher	rg(0-2)	South Africa: Western Cape Province	F		60.1	6.2		13.5		8.9	3.5		18.7
	no voucher	rg(0-3)	South Africa: Western Cape Province	F		56	5.4		12.5		8.7	3.8		15.7
	no voucher	rg(1-1)	South Africa: Western Cape Province	F		53.7	5.5		12.8		8.4	3.8		17.2
	no voucher	rg(1-2)	South Africa: Western Cape Province	F		54.2	4.9		11.7		8.7	3.8		16
	no voucher	rg(1-3)	South Africa: Western Cape Province	F		53.7	5.2		13		8.2	4.4		16
	no voucher	rg(2-1)	South Africa: Western Cape Province	F		57.6	5.8		13.3		8.8	3.7		18.3
	no voucher	rg(2-2)	South Africa: Western Cape Province	F		54.6	5.3		11.6		7.9	3.5		16.4
	no voucher	rg(2-3)	South Africa: Western Cape Province	F		57.3	5.8		14		9	3.4		19
	no voucher	rg(3-0)	South Africa: Western Cape Province	F		47.3	4.8		10.5		7.5	3.1		15.2
	no voucher	rg(3-2)	South Africa: Western Cape Province	F		53.7	5.3		11.8		8.7	4.2		15.8
	no voucher	rg(3-3)	South Africa: Western Cape Province	F		57.6	5.7		12.5		9.2	4.2		18.4
	no voucher	rg12-0	South Africa: Western Cape Province	F		45.7	4.7		10.3		7	2.9		14.1
	no voucher	rg13-0	South Africa: Western Cape Province	F		54.3	5.8		12.4		8.9	3.9		17
	no voucher	sd(0-1)	South Africa: Western Cape Province	F		56.1	5.1		13.2		8.8	3.8		17.3
	no voucher	sd(0-2)	South Africa: Western Cape Province	F		53	5.3		13		8.4	3.3		17.1
	no voucher	sd(0-3)	South Africa: Western Cape Province	F		54.5	4.9		12.6		8.3	3.4		17
	no voucher	sd(1-0)	South Africa: Western Cape Province	F		53.3	5.5		13.7		8.8	3.1		17.8
	no voucher	sd(1-1)	South Africa: Western Cape Province	F		51.8	4.9		12.3		7.5	3.4		15.5
	no voucher	sd(1-2)	South Africa: Western Cape Province	F		49.4	4.3		11.5		7.7	3		15.4
	no voucher	sd(1-3)	South Africa: Western Cape Province	F		51.9	4.3		13.1		8	3.5		16.7
	no voucher	sd(2-0)	South Africa: Western Cape Province	F		56.9	5		12.6		8.7	3.5		16.8
	no voucher	sd(2-1)	South Africa: Western Cape Province	F		52.8	5.3		12.5		8.8	3.8		17.2
	no voucher	sd(2-2)	South Africa: Western Cape Province	F		53.4	4.6		13.7		8.3	3.2		16.4
	no voucher	sd(2-3)	South Africa: Western Cape Province	F		45.5	4.7		11		8.2	3.7		14.4
	no voucher	sd(3-0)	South Africa: Western Cape Province	F		56.5	5.5		12.8		8.5	4.1		16.7
	no voucher	sd(3-2)	South Africa: Western Cape Province	F		47.4	4.9		11.8		7.7	2.9		15.6
	no voucher	sd(3-3)	South Africa: Western Cape Province	F		49.5	5		12.6		8.1	3.3		16.7
	no voucher	sd12-0	South Africa: Western Cape Province	F		51.1	4.5		12.3		8.1	3.2		14.7
	no voucher	sd13-0	South Africa: Western Cape Province	F		49.6	5.3		12.3		8.3	3.2		15.6
	no voucher	xb(1-2)	South Africa: Western Cape Province	F		56.6	4.1		14.3		8.7	2.7		17.1
	no voucher	xb(2-0)	South Africa: Western Cape Province	F		42.4	4.1		11.2		7.2	3.1		12.9
	no voucher	xb(2-1)	South Africa: Western Cape Province	F		48.3	4.9		13.1		8.1	4		15.2
	no voucher	xb(2-3)	South Africa: Western Cape Province	F		35.5	4.2		9.6		6.8	2.6		12.8
	no voucher	xb(3-2)	South Africa: Western Cape Province	F		34.8	3.8		9.6		6.4	3.2		13
	no voucher	xb1213)	South Africa: Western Cape Province	F		36.5	3.5		9.1		7.1	2.7		11.7
	no voucher	xg(2-3)	South Africa: Western Cape Province	F		45.8	4.6		11.4		7.9	3.7		14.3
	no voucher	xg(3-2)	South Africa: Western Cape Province	F		52.2	5.2		12		8.8	3.8		16.7
	no voucher	xg(mh1)	South Africa: Western Cape Province	F		52.8	5		11.7		7.5	3.2		16.5
	no voucher	xg(mh2)	South Africa: Western Cape Province	F		50.3	5.3		12		8.2	3.6		17.4
	no voucher	xg(mh3)	South Africa: Western Cape Province	F		54.1	5.3		13		9.3	3.4		16.7
	no voucher	xg13-0	South Africa: Western Cape Province	F		35.1	3.7		8.4		6.5	2.6		11.4
	no voucher	xg2-12	South Africa: Western Cape Province	F		34.1	3.9		9.1		6.5	2.3		11.5
	no voucher	xm(0-1)	South Africa: Western Cape Province	F		48.3	4.8		11		8.1	3.6		15.6
	no voucher	xm(0-2)	South Africa: Western Cape Province	F		45.8	4.4		11		7.1	3.3		13.9
	no voucher	xm(1-0)	South Africa: Western Cape Province	F		59.7	6.8		14.5		9.2	4.1		18.4
	no voucher	xm(3-0)	South Africa: Western Cape Province	F		54	5.5		11.5		8.5	3.7		15.9
	no voucher	xr(0-3)	South Africa: Western Cape Province	F		52.4	5.3		12.5		9.6	4.1		15.2
	no voucher	xr(1-1)	South Africa: Western Cape Province	F		55.7	4.9		13.1		8.5	3.2		16.1
	no voucher	xr(1-2)	South Africa: Western Cape Province	F		46.3	4.8		10.8		8.5	3.1		13.2
	no voucher	xr(16)	South Africa: Western Cape Province	F		47.3	4.3		11.5		6.8	2.8		13.5
	no voucher	xr(2-1)	South Africa: Western Cape Province	F		56.6	6		14		9.1	4.2		18.3
	no voucher	xr(2-2)	South Africa: Western Cape Province	F		57.8	5.4		13.3		9.1	4		17.2
	no voucher	xr3-12	South Africa: Western Cape Province	F		53.2	5.1		12.4		8.4	3.3		15.9
	no voucher	xs(1-3)	South Africa: Western Cape Province	F		50.9	5.5		12.9		9	3.7		15
	no voucher	xs(2-3)	South Africa: Western Cape Province	F		57.5	5.9		13.7		8.2	3.3		16.8
	no voucher	jd(1-2)	South Africa: Western Cape Province	M		37.8	3.4		9.2		6.4	2.8		13.3
	no voucher	rg(1-0)	South Africa: Western Cape Province	M		38.2	4.4		10.8		7.2	3.1		13.8
	no voucher	rg(2-0)	South Africa: Western Cape Province	M		37.1	3.8		9.5		6.4	2.8		13.6
	no voucher	sd(3-1)	South Africa: Western Cape Province	M		36.8	3.7		9.5		6.5	2.5		12.8
	no voucher	Xb(1-0)	South Africa: Western Cape Province	M		41	3.5		12		7.8	2.6		14.6
	no voucher	xb(1-3)	South Africa: Western Cape Province	M		40.5	4.4		10.7		6.9	3.4		15
	no voucher	xb(12-0	South Africa: Western Cape Province	M		34.4	4		9.2		7.9	2.7		12.4
	no voucher	xb12-2	South Africa: Western Cape Province	M		37.5	4.2		10.6		7	3.2		13
	no voucher	xb13-1	South Africa: Western Cape Province	M		37.5	4		9.3		7.2	3.3		13.9
	no voucher	xg1-13	South Africa: Western Cape Province	M		32.1	3.2		8.4		6.5	2.9		11.2
	no voucher	xg123-0	South Africa: Western Cape Province	M		38.9	4.2		9.7		6.9	2.5		13.9
	no voucher	xg13-23	South Africa: Western Cape Province	M		41.2	4.1		10.2		7.2	3.7		14.6
	no voucher	xg13-3	South Africa: Western Cape Province	M		40.7	4.3		9.7		7.5	3.5		13.8
	no voucher	xg13-3	South Africa: Western Cape Province	M		37.1	4.1		10.5		7.4	3		13.7
	no voucher	xg23-1	South Africa: Western Cape Province	M		39.3	4.5		9.9		7.5	3		12.8
	no voucher	xr(1-3)	South Africa: Western Cape Province	M		39.6	4		9.8		6.7	2.8		12.9
	no voucher	xr(15)	South Africa: Western Cape Province	M		42.3	3.8		10.9		6.7	2.3		13.4
	no voucher	xr(2-3)	South Africa: Western Cape Province	M		38.7	4.3		9.5		7	3		12.5
	no voucher	xr(3-3)	South Africa: Western Cape Province	M		41	4.3		10.3		6.9	3.3		14.1
	no voucher	xr2-12	South Africa: Western Cape Province	M		40.2	3.4		10.1		6.8	2.6		13.1
	no voucher	xs(g1)	South Africa: Western Cape Province	M		39	4		10.5		6.1	3.1		13.2
	no voucher	xs(g2)	South Africa: Western Cape Province	M		38.2	3.3		9.9		6.7	2.4		12.3
	aveF	maxF	stdevF	countF	aveM	maxM	stdevM	countM	aveALL	maxALL	stdevALL	countALL
	51.1292	60.8	6.28097	65	38.5955	42.3	2.34327	22	47.9598	60.8	7.79258	87
X. laevis
	MHNG 2644.61	AMNH17301	Malawi: near Blantyre
	no voucher	cp1-12	South Africa: Western Cape Province	F		89.5	9.4		23.3		14.4	5.5		30.3
	no voucher	ea(3)	South Africa: Western Cape Province	F		91.5	9.5		24.3		15.7	5.7		29.7
	no voucher	ea(4)	South Africa: Western Cape Province	F		81.3	9.2		23.1		13.1	4		27.6
	no voucher	ea(6)	South Africa: Western Cape Province	F		91.5	10.1		25.5		15.8	5.4		33.2
	no voucher	ea(7)	South Africa: Western Cape Province	F		85.3	9.7		22.2		16.6	5.1		32.7
	no voucher	ea12-1	South Africa: Western Cape Province	F		83.6	9.5		22.1		12.9	4.3		26.8
	no voucher	kml(5)	South Africa: Western Cape Province	F		75.4	8.2		20.2		12.4	4.3		26.2
	no voucher	kml(6)	South Africa: Western Cape Province	F		98.1	11		28.4		18.2	6		33
	no voucher	kml(7)	South Africa: Western Cape Province	F		73.8	7.3		20.5		11.4	4.2		24
	no voucher	kml(8)	South Africa: Western Cape Province	F		85.9	9.1		22.2		12.8	4.9		27.1
	no voucher	lg0-12	South Africa: Western Cape Province	F		99.2	10.5		24		16.5	6		29.7
	no voucher	lg0-13	South Africa: Western Cape Province	F		76.7	8.1		20.6		13.3	4.9		25.8
	no voucher	lg1-13	South Africa: Western Cape Province	F		89.5	8.1		20.5		13.2	5		24.2
	no voucher	lg1-23	South Africa: Western Cape Province	F		85.4	9.2		21.7		13.5	5		27
	no voucher	lg12-0	South Africa: Western Cape Province	F		65	7.8		17.5		11	4.4		23.1
	no voucher	lg3-12	South Africa: Western Cape Province	F		91.2	8		23		15.6	4.9		26.4
	no voucher	lg3-123	South Africa: Western Cape Province	F		86.5	8.2		21.2		14.5	5.2		25.1
	no voucher	pbr(1)	South Africa: Western Cape Province	F		48.7	6		13.2		10	3.1		18.5
	no voucher	rgl(1)	South Africa: Western Cape Province	F		101.1	11.3		25.6		18.6	6		32.4
	no voucher	rgl(2)	South Africa: Western Cape Province	F		97.9	11.7		26.8		18.4	5.9		32.4
	no voucher	rgl(3)	South Africa: Western Cape Province	F		103.3	11.1		26.5		17.1	5.8		32
	no voucher	xl(10)	South Africa: Western Cape Province	F		111	12.6		28.2		18.6	7.5		34.5
	no voucher	xl(11)	South Africa: Western Cape Province	F		99.1	10.5		25.2		16.9	6.5		32.1
	no voucher	xl(12)	South Africa: Western Cape Province	F		99.3	11.6		24.4		18.3	6.4		32.5
	no voucher	xl(14)	South Africa: Western Cape Province	F		92	9.8		23		16.2	5.6		25.5
	no voucher	xl(15)	South Africa: Western Cape Province	F		96.9	10.6		22.9		16.2	5.8		29.5
	no voucher	xl(25)	South Africa: Western Cape Province	F		48.2	5.3		13.7		7.3	3.5		16
	no voucher	xl(27)	South Africa: Western Cape Province	F		52.2	6.5		14.3		9.4	3.8		18.4
	no voucher	xl(3-2)	South Africa: Western Cape Province	F		76.7	9.4		20.2		15	5.2		29.8
	no voucher	xl(4)	South Africa: Western Cape Province	F		102	11.8		27.3		21.5	6.7		33
	no voucher	xl(6)	South Africa: Western Cape Province	F		119.2	12.5		27.5		20.7	7.8		35.4
	no voucher	xl(8)	South Africa: Western Cape Province	F		88.5	10.3		21.5		15.1	5		27.3
	no voucher	xsl(18)	South Africa: Western Cape Province	F		82.2	9.1		22.9		13	5		26.1
	no voucher	xsl(3)	South Africa: Western Cape Province	F		79	8.2		20.7		13.3	5		26.4
	no voucher	xsl(4)	South Africa: Western Cape Province	F		87.3	9.6		22.6		13.5	5.5		28.7
	no voucher	xsl(5)	South Africa: Western Cape Province	F		82.4	8.5		23.2		14.5	5.8		29.2
	no voucher	xsl(6)	South Africa: Western Cape Province	F		97.9	11.2		27.4		18.5	6.4		33.8
	no voucher	zm(0-1)	South Africa: Western Cape Province	F		81.3	9.6		21.4		12.5	4.3		25
	no voucher	zm(0-2)	South Africa: Western Cape Province	F		88.6	9.2		23		15.8	5.8		29.3
	no voucher	zm(0-3)	South Africa: Western Cape Province	F		86.6	9.9		24.4		16.4	6.2		30.8
	no voucher	zm(2-0)	South Africa: Western Cape Province	F		87	9.1		21.6		13.8	5.2		26.9
	no voucher	zm(3-0)	South Africa: Western Cape Province	F		87.3	9.5		22.5		14.6	4.8		28.2
	no voucher	zm0-13	South Africa: Western Cape Province	F		67.3	7.3		17.1		12.1	4.1		22.9
	no voucher	cp(1)	South Africa: Western Cape Province	M		76.2	7.9		21.5		14.2	4.8		29.1
	no voucher	cp(3)	South Africa: Western Cape Province	M		64.3	8		17.8		10.8	3.9		24.4
	no voucher	ea(1)	South Africa: Western Cape Province	M		55.6	6.5		15.8		9.7	3.4		24.3
	no voucher	ea(5)	South Africa: Western Cape Province	M		68.8	7.3		18.6		12.1	4.2		27.1
	no voucher	ea(8)	South Africa: Western Cape Province	M		64.3	6.6		18.2		11.3	3.7		24.9
	no voucher	gb(1)	South Africa: Western Cape Province	M		58.8	7.6		17.7		10.6	3.6		23.3
	no voucher	kml(4)	South Africa: Western Cape Province	M		65.2	6.1		18.4		11.8	4.2		25
	no voucher	lg(1-0)	South Africa: Western Cape Province	M		46.5	5.5		12.3		8.8	3.3		16.2
	no voucher	lg(1-1)	South Africa: Western Cape Province	M		45	5.1		13.3		8.3	2.9		16.3
	no voucher	lg(1-2)	South Africa: Western Cape Province	M		73.4	8.3		21.4		13.2	5.5		29.3
	no voucher	lg(1-3)	South Africa: Western Cape Province	M		53.4	6.3		14.8		10.1	3.8		19.9
	no voucher	lg(2-0)	South Africa: Western Cape Province	M		45.8	4.9		12.4		8.6	3.4		16.7
	no voucher	lg(2-1)	South Africa: Western Cape Province	M		70.8	8.3		19.8		12.6	4.9		26.5
	no voucher	lg(2-2)	South Africa: Western Cape Province	M		80.5	9.1		20.9		13.8	5.1		28.4
	no voucher	lg(2-3)	South Africa: Western Cape Province	M		50.2	5.6		12.7		9.2	3.7		19.3
	no voucher	lg(3-0)	South Africa: Western Cape Province	M		41.1	4.8		11.8		7.5	2.8		14.6
	no voucher	lg(3-1)	South Africa: Western Cape Province	M		72.1	7.3		19.8		12.2	4.5		28.6
	no voucher	lg(3-2)	South Africa: Western Cape Province	M		40.8	4.5		11.2		7.9	3.2		14.2
	no voucher	lg(3-3)	South Africa: Western Cape Province	M		54.3	6.7		14		10.5	3.9		20.5
	no voucher	lg0-23	South Africa: Western Cape Province	M		47.7	5.8		14.1		8.6	3.5		18.1
	no voucher	lg(12-3)	South Africa: Western Cape Province
	no voucher	lg13-0	South Africa: Western Cape Province	M		59.2	6.6		17.1		11.1	4.1		21.5
	no voucher	lg2-12	South Africa: Western Cape Province	M		58.1	6.4		16.2		10.5	4.1		22.4
	no voucher	lg2-23	South Africa: Western Cape Province	M		53	6.3		15.3		9.9	4.1		20.5
	no voucher	lg3-23	South Africa: Western Cape Province	M		60.4	7.3		16.4		11	4.2		23.2
	no voucher	pbr(2)	South Africa: Western Cape Province	M		45.1	4.9		11.7		8.3	3.1		16.1
	no voucher	pbr(3)	South Africa: Western Cape Province	M		54.4	5.6		15.9		9.6	3.7		20.5
	no voucher	pbr(4)	South Africa: Western Cape Province	M		42	5.3		12.1		7.1	2.9		15.5
	no voucher	xl(0-3)	South Africa: Western Cape Province	M		70.9	8.3		19.5		13.1	5.1		27
	no voucher	xl(1-0)	South Africa: Western Cape Province	M		79.4	9.3		20.3		14.3	5.3		28.9
	no voucher	xl(16)	South Africa: Western Cape Province	M		72.2	8.3		19.1		14.2	6		27.1
	no voucher	xl(17)	South Africa: Western Cape Province	M		82.8	9.3		23.5		16.3	5.9		32.3
	no voucher	xl(18)	South Africa: Western Cape Province	M		63.8	6.7		18.5		12.4	4.6		23.4
	no voucher	xl(19)	South Africa: Western Cape Province	M		67.1	8.4		18.5		14	4.6		26.2
	no voucher	xl(2-0)	South Africa: Western Cape Province	M		73.9	8.2		19.6		15.1	5.8		28.6
	no voucher	xl(20)	South Africa: Western Cape Province	M		72.2	8.7		19.6		14	5.2		27.8
	no voucher	xl(21)	South Africa: Western Cape Province	M		71.5	8.5		18.6		13.1	5		26.4
	no voucher	xl(22)	South Africa: Western Cape Province	M		71.6	7.9		20.9		14.2	5.3		28.3
	no voucher	xl(23)	South Africa: Western Cape Province	M		71.7	8.4		20.8		13.9	4.2		26.9
	no voucher	xl(24)	South Africa: Western Cape Province	M		55.6	7.4		16		11.5	3.5		25.6
	no voucher	xl(26)	South Africa: Western Cape Province	M		58.8	6.9		16		10	4.2		21
	no voucher	xl(28)	South Africa: Western Cape Province	M		70.9	8.7		18.2		13.2	5.1		27.7
	no voucher	xl(29)	South Africa: Western Cape Province	M		76.1	8.2		21		14.7	5		28.1
	no voucher	xl(3-1)	South Africa: Western Cape Province	M		70.8	9.5		20		13.7	5.7		27.8
	no voucher	xl(3-2)	South Africa: Western Cape Province	M		76.7	9.4		20.2		15	5.2		29.8
	no voucher	xl(30)	South Africa: Western Cape Province	M		53.2	6.2		16.1		10.8	3.6		21.8
	no voucher	xl(5)	South Africa: Western Cape Province	M		73.7	8		21.4		14.1	5.2		29
	no voucher	xl(7)	South Africa: Western Cape Province	M		75.7	8.3		21.7		14.2	4.7		29.2
	no voucher	xl(9)	South Africa: Western Cape Province	M		72.8	8.2		19.2		13	5.3		27.1
	no voucher	xsl(1)	South Africa: Western Cape Province	M		67	8.2		20.3		14.3	5.4		28.4
	no voucher	xsl(15)	South Africa: Western Cape Province	M		58.7	6.3		16.2		10.3	3.8		22.6
	no voucher	xsl(16)	South Africa: Western Cape Province	M		60.5	6.2		16.2		10	4.3		23.7
	no voucher	xsl(17)	South Africa: Western Cape Province	M		75.3	9.4		22.7		12.9	4.9		30.4
	no voucher	xsl(2)	South Africa: Western Cape Province	M		74.2	9		21.4		14.5	5.3		32.1
	no voucher	zm(0-12	South Africa: Western Cape Province	M		64.9	7.7		19.1		12.1	4.4		27.1
	no voucher	zm(1-0)	South Africa: Western Cape Province	M		70.2	8.3		18.6		13.6	4.5		28.1
	no voucher	zm(1-1)	South Africa: Western Cape Province	M		59.5	6.8		16.8		11.3	4.2		22.1
	no voucher	zm(1-2)	South Africa: Western Cape Province	M		58.2	7		16.8		11.6	4.1		23.6
	no voucher	zm(1-3)	South Africa: Western Cape Province	M		64.3	7.5		18.1		11.5	4.5		26.1
	no voucher	zm(2-1)	South Africa: Western Cape Province	M		66	7.7		18.7		12.8	4.6		27.6
	no voucher	zm(2-2)	South Africa: Western Cape Province	M		70.7	7.8		18.7		14.3	4.2		26.5
	no voucher	zm(2-3)	South Africa: Western Cape Province	M		62.5	7.7		18.1		11	4.7		21.1
	no voucher	zm(3-1)	South Africa: Western Cape Province	M		62.4	6.8		18		11	4.5		25.6
	no voucher	zm(3-2)	South Africa: Western Cape Province	M		62.3	7.1		16.8		11.6	3.6		21.5
	no voucher	zm(3-3)	South Africa: Western Cape Province	M		67.5	8		17.8		12.9	4.1		24.5
	no voucher	zm12-0	South Africa: Western Cape Province	M		62.9	6.5		17.4		11.9	4.6		25
	no voucher	zm13-0	South Africa: Western Cape Province	M		53.1	6.5		16		10.5	3.7		21.1
	aveF	maxF	stdevF	countF	aveM	maxM	stdevM	countM	aveALL	maxALL	stdevALL	countALL
	86.3349	119.2	14.6853	43	63.4636	82.8	10.462	66	72.4862	119.2	16.6087	109
X. petersii
	MHNG 2644.67	AMNH17324	Congo Republic: between Loubomo and Pointe Noire
	IRSNB	PM085	DRC: Bas-Congo: Luki Reserve	M
	IRSNB	PM086	DRC: Bas-Congo: Luki Reserve	M
	IRSNB	PM108	DRC: Bas-Congo: Luki Reserve	M
	IRSNB	PM109	DRC: Bas-Congo: Luki Reserve	M
	IRSNB	PM118	DRC: Bas-Congo: Tsumba-Kituti	F
	NMP6V 74142	VG08-81	Angola: Bié Province: Nequilo	juvenile
X. poweri
	MHNG 1017. 74			m?	HOLOTYPE (X. laevis sudanensis)	50.06	6.03	10.62	13.09	28.67	10.25	2.89	21.81	19.48	15	13	21	27	19
	MHNG 1017. 79		Cameroon: Adamaoua	m?	PARATYPE (X. laevis sudanensis)	54.19	6.21	11.05	13.57	30.11	10.57	3.64	21.62	19.77	13	16	20	18	21
	MHNG 1017. 81		Cameroon: Adamaoua	M	PARATYPE (X. laevis sudanensis)	50.76	5.56	10.85	14.02	31.01	10.32	2.89	21.41	20.45	13	12	20	25	25
	MHNG 1017. 82		Cameroon: Adamaoua	F	PARATYPE (X. laevis sudanensis)	46.85	5.79	10.03	12.93	29.11	9.02	3	19.77	18.27	15	12	21	24	20
	MCZ A-148106	BJE3252	Cameroon: Lower Bafut	M(?small)		24.43	3.33		6.89		5.79	2.16	11.57	9.72	13	15	24	23
	MCZ A-148107	BJE3253	Cameroon: Lower Bafut	M(?small)		30.16	3.64		8.76		6.23	2.76	13.65	11.06	14	13	28	29	22
	MCZ A-148108	BJE3254	Cameroon: Lower Bafut	M(?small)		23.22	3.06		6.85		5.01	2.06	10.59	9.27	14	14	22	26
	MCZ A-148109	BJE3255	Cameroon: Lower Bafut	M(?small)		23.24	3.13		10.58		5.3	2.16	10.71	9.33	13	13	19	26
	MHNG 2644.052	AMNH17259	Jos, Nigeria	M		45.4	4.1	10.6	11.4	24.1	8.5	2.9	12.2	16.1	13	11	20	22	24
	MHNG 2644.053	AMNH17263	Zambia	M		55.6	4.4	11.1	12.2	31.1	8.9	3	16.2	21.6
	MHNG 2645.073	AMNH17260	Jos, Nigeria	F		54.1	5.6	12.4	11.6	28.2	9.1	2.7	14.1	19.5
	MHNG 2645.074	AMNH17261	Jos, Nigeria	M		43.5	3.9	10.8	10.4	26.5	7.7	2.9	12.6	17.9
	MHNG 2645.075	AMNH17262	Jos, Nigeria	F		53.9	5.4	12.8	11.5	30.2	9.7	3.4	14	20.9
	MHNG 2645.076	AMNH17264	Zambia	F		71	5.4	13.4	14.6	38.3	11.1	3.5	19.5	21.7
	MHNG 2645.077	AMNH17265	Zambia	M		55.3	4.8	12	12.3	31.5	10	3.4	16.1	20.5
	MHNG 2645.078	AMNH17266	Zambia	F		66.1	5.7	12.5	12.7	35.5	10	3.3	18.5	22.4
	NMP6V 74582/2	VG09-100	Cameroon: Tchabal Gangdaba	M
	NMP6V 74586/2	VG09-128	Cameroon: Mabor	subadult
	no voucher	Xen038	Nigeria: Jos	F		50.2	5.1	12.2	11.9	26.4	10.2	2.7	12.9	19
	no voucher	Xen039	Nigeria: Jos	F		58	5.4	13	13.2	27.2	11.1	3.5	15.3	19
	no voucher	Xen040	Nigeria: Jos	F		60.8	5.5	12.7	12.6	28.2	9.7	2.9	15.1	20
	no voucher	Xen041	Nigeria: Jos	F		65	6.6	12.7	14	31.9	10.9	4.7	18	20.7
	no voucher	Xen042	Nigeria: Jos	F		64.5	5.8	12.9	13.4	32.5	10.2	4.2	17.6	20.1
	no voucher	Xen043	Nigeria: Jos	F		64	6.1	12.6	13.2	31.4	10.4	4.3	16.8	21.1
	no voucher	Xen047	Nigeria: Jos	F		55.1	5.1	11	11.7	27.1	9.5	3.9	16.2	19.8
	no voucher	Xen053	Nigeria: Jos	F		60.5	5	11.9	12.5	28.9	9.7	4	15.4	20.4
	no voucher	Xen054	Nigeria: Jos	F		57.3	4.7	11.7	11.9	29.6	10	3.8	16.9	20.7
	no voucher	Xen057	Nigeria: Jos	F		57.8	4.9	12.6	12.2	28.2	9.7	3.7	14.8	20.9
	no voucher	Xen058	Cameroon: Ngaoundere	M		51.1	4.7	11.1	11.5	27.9	9.1	3.8	13.7	18.5
	no voucher	Xen059	Cameroon: Ngaoundere	F		62.2	4.7	10.9	11.8	30.7	9.2	4.2	17.2	20
	no voucher	Xen044	Nigeria: Jos	M		48.6	5.1	10.9	10.9	26.5	8.2	3.5	14.5	17.1
	no voucher	Xen045	Nigeria: Jos	M		50.4	4.7	11	11.6	27.4	8.7	4.1	14.7	17.7
	no voucher	Xen046	Nigeria: Jos	M		49.8	4.4	10.8	11.1	27.9	8.9	3.6	16.2	18.2
	no voucher	Xen048	Nigeria: Jos	M		51.7	4.8	10.9	11	28.5	8.3	3.7	15.5	19.1
	no voucher	Xen049	Nigeria: Jos	M		54.8	5.3	11.5	12.5	29.2	9.2	4.1	16.1	20.1
	no voucher	Xen050	Nigeria: Jos	M		54.9	5.4	11.3	11.3	27.7	9.1	3.8	16.8	19.5
	no voucher	Xen051	Nigeria: Jos	M		44.9	4.5	9.9	10.2	25.7	8.3	3.2	14.5	18.5
	no voucher	Xen052	Nigeria: Jos	M		46.9	4.4	10.4	10.4	25.7	8.7	3.2	13.3	18.1
	no voucher	Xen055	Nigeria: Jos	M		50.4	4.2	10.9	11	26.5	8.7	3.3	15.2	19.2
	no voucher	Xen056	Nigeria: Jos	M		48.2	3.6	10.9	11.1	26.2	8.7	2.9	13.9	19.2
	aveF	maxF	stdevF	countF	aveM	maxM	stdevM	countM	aveALL	maxALL	stdevALL	countALL			13.6667	13.2222	21.6667	24.4444	21.8333
	59.2094	71	6.30508	16	45.7982	55.6	10.5235	22	51.445	71	11.1355	38			15	16	28	29	25
															13	11	19	18	19
															9	9	9	9	6
X. victorianus
	MCZ A-14616		Uganda		HOLOTYPE (X. laevis bunyoniensis)	35.23	4.47	9.31	9.17	21.74	7.59	2.25	14.01	13.12
	MCZ A-140093	BJE2924	DRC: Djugo Territory	F		65.22	6.23				13.36	5.43	28.05	24.77
	MCZ A-140094	BJE2925	DRC: Djugo Territory	F		66.47	5.81				12.9	4.78	23.08	22.43
	MCZ A-140097	BJE2928	DRC: Djugo Territory	M		48.51	5.43				10.57	4.23	20.96	18.84
	MCZ A-140118	BJE2897	DRC: Djugo Territory	M		47.92	5.03				11.07	4.17	21.83	17.84
	MCZ A-140119	BJE2898	DRC: Djugo Territory	M		48.04	4.05				10.77	4.7	20.44	18.23
	MCZ A-140120	BJE2899	DRC: Djugo Territory	F		53.48	5.13				10.3	3.82	19.53	16.38
	MCZ A-140122	BJE2901	DRC: Djugo Territory	M		48.01	4.77				9.65	5.14	19.66	17.58
	MCZ A-140123	BJE2902	DRC: Djugo Territory	M		51.18	4.9				10.41	4.1	21.48	19.7
	MCZ A-140124	BJE2903	DRC: Djugo Territory	M		50.52	5.51				10.95	4.59	20.14	18.81
	MCZ A-140125	BJE2904	DRC: Djugo Territory	M		48.74	4.86				10.29	3.66	19.5	17.11
	MCZ A-140126	BJE2905	DRC: Djugo Territory	M		49.77	4.86				10.32	4.76	21.9	18.64
	MCZ A-140127	BJE2906	DRC: Djugo Territory	M		52.21	5.59				10.96	4.68	22.33	19.67
	MCZ A-140128	BJE2907	DRC: Djugo Territory	M		47.83	4.91				10.29	4.02	20.1	18.09
	MCZ A-140129	BJE2908	DRC: Djugo Territory	F		63.51	6.48				12.01	4.82	23.96	22.95
	MCZ A-140130	BJE2909	DRC: Djugo Territory	F		60.78	6.19				12.58	5.2	23.49	21.42
	MCZ A-140131	BJE2910	DRC: Djugo Territory	F		67.75	6.67				13.02	5.65	24.96	21.53
	MCZ A-140133	BJE2912	DRC: Djugo Territory	F		60.62	6.43				11.12	4.26	23.05	21.23
	MCZ A-140135	BJE2919	DRC: Djugo Territory	M		48.21	4.4				10.2	4.53	20.7	17.87
	MCZ A-140159	BJE2852	DRC: Bunia	F		64.27	6.44				12.92	4.53	24.31	21.02
	MCZ A-140160	BJE2853	DRC: Bunia	M		48.45	2.74				10.77	4.16	20.54	18.86
	MCZ A-140161	BJE2854	DRC: Bunia	M		52.29	5.21				11.09	4.23	21.37	18.98
	MCZ A-140166	BJE2952	DRC: Djugo Territory	F		66.62	5.98				12.85	5.32	24.12	21.56
	MCZ A-140167	BJE2955	DRC: Djugo Territory	M		57.41	5.07				10.41	4.86	21.95	19.34
	CAS 168711	RCD10641	Tanzania: Tanga Region
	no voucher	xen232	Rwanda: Shama
	no voucher	xen234	Uganda: Kitanga
	aveF	maxF	stdevF	countF	aveM	maxM	stdevM	countM	aveALL	maxALL	stdevALL	countALL
	60.395	67.75	9.76982	10	49.935	57.41	2.67386	14	54.2933	67.75	8.31506	24
muelleri group
X. borealis
	MHNG 2644.064	AMNH17312	Kenya: Samburu Range	M		48.1	3.9	10.2	13	31.8	8.9	3.3	17.1	19.1
	lost voucher (MHNG)	AMNH17313	Kenya: Samburu Range	F		66.3	5.9	13.4	16.8	38.7	11.7	4.4	19.3	25.7
	lost voucher (MHNG)	AMNH17314	Kenya: Samburu Range	M		45.8	4.2	12.2	13.9	31.2	9.1	3.3	14.8	20.1
	lost voucher (MHNG)	AMNH17315	Kenya: Samburu Range	F		68.5	5.6	12.6	16	35.6	12	4.3	18.2	23.9
	CAS 9559		Kenya: Doinyo												13	16	25	23
	CAS 9560		Kenya: Doinyo												13	18	25	28	28
	CAS 9561		Kenya: Doinyo												13	12	26	25	21
	CAS 38862		Kenya: Mt. Kenya												14	15	26	22
	CAS 38863		Kenya: Mt. Kenya												15	14	26	24	19
	CAS 38864		Kenya: Mt. Kenya												16	17	26	19	18
	CAS 85737		Tanzania: Tanganyika, Mt. Meru												15	13	21	27
	CAS 85738		Tanzania: Tanganyika, Mt. Meru												13	13	23	26
	CAS 85739		Tanzania: Tanganyika, Mt. Meru												14	11	21	24
	CAS 111969		Kenya: Kibwezi												10	17	24	22	24
	CAS 111970		Kenya: Kibwezi												13	17	27	26	23
	CAS 111971		Kenya: Kibwezi												14	18	28	26	23
	CAS 111972		Kenya: Kibwezi												13	17	29	30	25
	CAS 111973		Kenya: Kibwezi												12	16	23	26	25
	CAS 122160		Kenya: Nairobi	F?		44.62	5.21	9.74	11.48	25.32	9.48	2.07	18.13	15.27	14	18	27	27	25
	CAS 122161		Kenya: Nairobi	M		39.74	4.27	8.58	10.1	25.55	7.74	2.27	17.53	14.69	16	16	24	29	27
	CAS 122162		Kenya: Nairobi	F?		38.48	4.49	8.65	10.66	24.99	8.72	2.96	16.94	15.08	16	18	24	29	26
	CAS 122163		Kenya: Nairobi	F		43.67	4.5	8.87	11.62	26.24	9.05	3.01	17.95	14.82	14	16	28	26	26
	CAS 122164		Kenya: Nairobi	?		35.13	3.93	7.9	9.52	14.26	7.27	2.54	14.8	12.8	15	14	31	31	25
	CAS 122165		Kenya: Nairobi	F?		34.94	3.79	7.76	9	21.54	7.08	2.06	14.92	12.56	15	14	25	29	29
	CAS 122166		Kenya: Nairobi	F?		36.76	4.06	7.92	9.04	20.13	6.61	2.16	14.46	10.77	14	15	31	28	27
	CAS 144168		Kenya: Molo	?		37.42	4.67	9.13	9.78	25.75	7.61	3.28	16.29	15.55	13	14	24	23
	CAS 144170		Kenya: Molo	?		40.31	5.2	8.89	10.66	24.86	8.6	3.27	16.97	14.56	12	13	26	27	25
	CAS 144172		Kenya: Molo	M?		29.2	3.98	7.11	8.71	20.84	6.96	2.47	13.02	12.23	13	12	27	30
	CAS 144173		Kenya: Molo	?		38.55	4.68	9	10.65	25.27	8.4	2.82	17.27	15.25	15	16	23	26
	CAS 144174		Kenya: Molo	?		37.96	4.72	8.81	11	26.27	8.85	2.91	16.58	14.26	13	15	25	28
	CAS 144175		Kenya: Molo	?		37.73	4.08	8.13	10.01	24.48	8.03	3.3	15.76	14.28	13	15	25	25	24
	CAS 144176		Kenya: Molo	?		39.1	4.56	8.85	10.41	24.8	8.79	2.93	17.1	15.24	12	15	22	25
	CAS 144177		Kenya: Molo	F		40.56	4.68	9.2	10.82	24.69	8.43	3.27	17.31	15.19	13	13	23	31
	CAS 144178		Kenya: Molo	?		31.98	3.84	7.72	9.3	21.69	7.53	3.13	14.55	13.31	15	12	27	31	24
	CAS 144182		Kenya: Molo	?		29.35	3.66	6.97	8	18.56	6.39	2.26	13.17	11.65	13	14	25	31	23
	CAS 152715		Kenya: Talek River	?		34.63	4.33	7.27	9.07	19.38	7.44	2.85	15.1	12.61	13	13	23	27
	CAS 152716		Kenya: Talek River	?		43.4	5.07	8.95	11.11	27.34	8.46	3.31	20.42	15.61	12	13	30	29	26
	CAS 152717		Kenya: Talek River	M		47.86	5.59	9.41	12.57	30.87	9.39	3.44	22.68	19.98	13	13	24	26
	CAS 152771		Kenya: Kisumu Dist.	M		37.12	4.58	8.23	10.2	22.24	7.98	3.15	15.03	13.18	14	14	26	28	26
	CAS 152772		Kenya: Kisumu Dist.	?		34.04	3.58	7.21	8.5	21.2	6.44	2.4	13.93	12.53	13	15	26	26	28
	CAS 152773		Kenya: Kisumu Dist.	?		34.98	4.12	7.62	8.4	22.79	6.73	2.62	15.17	12.75	14	18	26	24	25
	CAS 152774		Kenya: Kisumu Dist.	F?		36.87	3.98	7.72	9.36	22.13	7.68	2.34	16.34	13.12	14	15	24	29	24
	CAS 152775		Kenya: Kisumu Dist.	M?		38.82	4.19	8.26	10.06	21.95	7.98	2.61	15.59	22.97	13	16	25	28	27
	CAS 152776		Kenya: Kisumu Dist.	M		32.41	3.91	7.37	8.34	19.73	6.53	2.51	13.3	12.27	11	14	25	29	24
	CAS 152777		Kenya: Kisumu Dist.	F?		32.1	3.85	7.63	8.41	19.6	6.92	2.42	13.75	11.4	15	18	22	31	26
	CAS 152778		Kenya: Kisumu Dist.	F		54.52	5.77	10.64	14.25	30.71	9.78	3.33	19.35	16.36	11	14	24	25	27
	CAS 152779		Kenya: Kisumu Dist.	?		36.33	4.5	8.57	9.82	21.98	7.79	2.71	16.14	12.64	13	17	21	27	26
	CAS 152780		Kenya: Kisumu Dist.	?		32.63	3.84	6.78	8.29	19.11	6.7	2.48	13.49	12.72	13	18	25	25	23
	CAS 157473		Kenya: Olorgesaille National Monument												14		26	29
	no voucher	xen226	Kenya: Kiambu
	no voucher	xen227	Kenya: Marsabit
	no voucher	xen230	Kenya: Maral
	no voucher	Xen237	Kenya: Marsabit	F		68.7	5.3	14.1	16.7	35.9	11.5	3.7	19.2	23.4
	no voucher	Xen238	Kenya: Marsabit	F		74.6	5.3	15	17.1	36.1	11	4.1	18	24
	no voucher	Xen239	Kenya: Marsabit	F		69	5.4	13.4	16.8	36.5	10.5	3.4	18.1	23.3
	no voucher	Xen240	Kenya: Marsabit	F		73.5	5.3	14.5	17.5	39.4	10.6	3.5	20.8	25.1
	no voucher	Xen241	Kenya: Marsabit	F		70.5	5.2	14.5	16.5	35.6	11.2	3.8	18.1	23.4
	no voucher	Xen242	Kenya: Marsabit	F		71.8	4.5	14.4	16	36.8	11.5	3.5	18.7	24.3
	no voucher	Xen243	Kenya: Marsabit	F		66.5	5.2	14.5	16	31.5	11.1	3.9	18.1	21.6
	no voucher	Xen244	Kenya: Marsabit	F		64	4.8	13.5	15.3	35	10.2	3.6	19.7	22.7
	no voucher	Xen245	Kenya: Marsabit	M		60.3	5	13.2	15.5	32.9	9.7	3.3	17.6	23.3
	no voucher	Xen246	Kenya: Marsabit	F		71.3	5.4	14.3	16.6	34.9	11	4	19.5	23.3
	no voucher	Xen247	Kenya: Marsabit	F		69.5	5.5	14.1	16.7	37.6	10.5	4	18.7	22.5
	no voucher	Xen248	Kenya: Marsabit	M		58.7	5.1	13.1	15.6	33.1	9.5	3	18.3	22.3
	no voucher	Xen249	Kenya: Marsabit	M		58.7	4.1	12.3	15.4	33.6	9.6	3	17.2	21.8
	no voucher	Xen250	Kenya: Marsabit	M		57.1	4.2	12.5	14.4	34.9	8.8	2.9	17.8	22.3
	no voucher	Xen251	Kenya: Marsabit	M		61.3	4.9	13.2	17.3	33.8	10.3	3.4	16.4	22.3
	no voucher	Xen252	Kenya: Marsabit	M		60	4.7	12.9	16.2	38.1	9.2	3.6	18.5	23.6
	no voucher	Xen253	Kenya: Marsabit	M		58.3	4.3	12.2	14.7	34.5	8.9	3.4	17.2	22
	no voucher	Xen254	Kenya: Marsabit	M		55.9	4.3	13.2	14.2	32.9	9.2	3.5	15.2	22
	no voucher	Xen255	Kenya: Marsabit	M		57.2	4.5	12.9	15.4	36.8	9.5	3.9	16	22.8
	no voucher	Xen256	Kenya: Marsabit	M		57.4	4.5	14.6	15.5	34.2	9.5	3.3	16.2	22.2
	aveF	maxF	stdevF	countF	aveM	maxM	stdevM	countM	aveALL	maxALL	stdevALL	countALL			13.4889	15.0455	25.2	26.8222	24.8065
	57.11	74.6	15.9744	20	39.8812	48.1	7.01956	8	48.9669	74.6	14.2423	54			16	18	31	31	29
															10	11	21	19	18
															45	44	45	45	31
X. clivii
	MCZ cryogenic 306	BJE1476	Ethiopia: Bore	?		36.53	3.8				9.05	4.06	16.82	14.46
	MCZ cryogenic 307	BJE1477	Ethiopia: Bore	?		38.15	4.14				10.38	4.3	17.52	14.9
	MCZ cryogenic 308	BJE1478	Ethiopia: Bore	?		44.22	4.76				10.96	4.49	19.2	15.38
	MCZ cryogenic 309	BJE1479	Ethiopia: Bore	?		49.78	5.51				11.99	6.03	22.38	18.34
	MCZ cryogenic 328	BJE1500	Ethiopia: Bore	?		50.19	5.29				11.82	5.52	21.45	19.12
	MCZ cryogenic 329	BJE1501	Ethiopia: Bore	?		49.86	5.16				11.24	4.61	21.18	19.55
	MCZ cryogenic 330	BJE1502	Ethiopia: Bore	?		52.93	5.13				12.1	6.56	21.9	20.36
	MCZ cryogenic 331	BJE1503	Ethiopia: Ana Anasura	F		59.59	5.42				12.68	6.35	22.89	21.8
	MCZ cryogenic 332	BJE1504	Ethiopia: Ana Anasura	F		63.08	5.75				13.1	6.94	24.74	24
	MCZ cryogenic 338	BJE1510	Ethiopia: Ana Anasura	F		39.88	4.16				9.11	4.21	17.62	14.81
	MCZ cryogenic 339	BJE1511	Ethiopia: Ana Anasura	F		38.05	4.14				0.92	4.17	17.3	15.8
	MCZ cryogenic 340	BJE1512	Ethiopia: Ana Anasura	M		49.6	4.75				11.03	5.78	22.25	20.66
	MCZ cryogenic 341	BJE1513	Ethiopia: Ana Anasura	M		49.08	4.4				10.88	5.67	23.26	21.02
	MCZ cryogenic 342	BJE1514	Ethiopia: Ana Anasura	M		49.43	4.96				10.48	6.04	21.74	20.81
	MCZ cryogenic 343	BJE1515	Ethiopia: Ana Anasura	M		47.82	4.23				10.64	6.09	21.05	19.19
	MCZ cryogenic 344	BJE1516	Ethiopia: Ana Anasura	M		48.13	4.6				10.95	5.62	20.86	20.71
	MCZ cryogenic 350	BJE1522	Ethiopia: Bale	M		48.15	4.56				11.34	5.8	22.18	20.01
	MCZ cryogenic 351	BJE1523	Ethiopia: Bale	M		44.11	4.3				10.68	5.58	21.47	19.27
	MCZ cryogenic 352	BJE1524	Ethiopia: Bale	F		52.06	5.33				12.62	6.68	21.68	20.09
	MCZ cryogenic 353	BJE1525	Ethiopia: Bale	F		52.21	4.59				11.35	6.15	21.02	19.8
	MCZ cryogenic 354	BJE1526	Ethiopia: Bale	F		52.3	4.76				11.36	5.66	20.56	18
	MCZ cryogenic 377	BJE1549	Ethiopia: Gamagoffa	F		43.64	3.79				10.05	4.57	16.92	16.14
	MCZ cryogenic 378	BJE1550	Ethiopia: Gamagoffa	F		53.21	4.81				11.79	6.44	20.78	20.41
	MCZ cryogenic 379	BJE1551	Ethiopia: Gamagoffa	M		42.15	3.9				10.13	5.29	18.99	19.14
	MCZ cryogenic 380	BJE1552	Ethiopia: Dawro	F		56.88	5.42				12.17	6.26	24.88	21.49
	MCZ cryogenic 381	BJE1553	Ethiopia: Dawro	F		59	5.33				12.8	6.13	23.84	22.66
	MCZ cryogenic 382	BJE1554	Ethiopia: Dawro	M		45	4.5				10.62	5.55	21.27	18.1
	MCZ cryogenic 388	BJE1560	Ethiopia: Southwest Sewa	JUVENILE		25.67	2.98				6.83	3.8	11.21	11.69
	MCZ cryogenic 389	BJE1561	Ethiopia: Southwest Sewa	JUVENILE		22.79	2.75				6.2	3.43	10.07	10.3
	MCZ cryogenic 390	BJE1562	Ethiopia: Southwest Sewa	JUVENILE		22.44	2.64				5.66	3.2	9.55	10.41
	MCZ cryogenic 427	Z23301	Ethiopia: South Gondar	JUVENILE		22.88	3.22				6.25	3.43	9.56	10
	MCZ cryogenic 445	Z23319	Ethiopia: Maichew	M		40.21	4.06				9.66	4.41	17.86	17.16
	MCZ cryogenic 446	Z23320	Ethiopia: Maichew	M		39.63	3.65				9.47	4.32	17.67	17.22
	MCZ cryogenic 447	Z23321	Ethiopia: Maichew	M		39.68	4.11				9.6	4.2	17.92	18.29
	MCZ cryogenic 448	Z23322	Ethiopia: Maichew	M		38.87	4.07				9.6	4.46	17.57	17.25
	MCZ cryogenic 449	Z23323	Ethiopia: Maichew	F		39.72	3.96				9.46	4.54	17.51	15.72
	MHNG 2644.050	AMNH17252	Ethiopia	F		73.2	5.3	13.8	17.2	38.8	11.1	3.4	20.7	25.7
	MHNG 2645.067	AMNH17251	Ethiopia	M		53.8	4.5	11.6	14.5	35.2	9.7	3.5	15.9	23.3
	MHNG 2645.068	AMNH17253	Ethiopia	M		57.2	4.5	11.9	14.8	35.3	9.7	3.7	16.9	24.1
	MHNG 2645.069	AMNH17254	Ethiopia	F		71.9	5.8	14.2	7.5	39.4	12.8	4.3	18.9	26.3
	no voucher	Xen001	Ethiopia	M		54.7	4.1	11.5	15.3	36	9.9	3	19.4	23.2
	no voucher	Xen002	Ethiopia	M		57.4	4.7	12.4	15.9	32.3	10.4	3.8	19.4	22.3
	no voucher	Xen003	Ethiopia	F		70.9	6.1	13.5	16.7	36.7	11.6	3.9	20.5	26.1
	no voucher	Xen004	Ethiopia	M		53.7	5.1	11.4	14.7	32.3	9.6	3.9	17.9	22.6
	no voucher	Xen005	Ethiopia	F		74.6	6	13.5	17.5	37.2	11.4	4.8	22.4	25.8
	no voucher	Xen006	Ethiopia	M		55.9	4.9	11.8	14	35.1	10	4	17.7	24
	no voucher	Xen007	Ethiopia	F		75.7	5.9	14.2	18.2	40.1	12.8	5.2	21.4	26.8
	no voucher	Xen008	Ethiopia	F		70.4	6	13.6	17.3	38.4	11.7	4.2	21.8	25
	no voucher	Xen009	Ethiopia	M		59.1	5	11.7	4.7	34.8	10.1	3.4	18.8	23.1
	no voucher	Xen010	Ethiopia	F		71.9	5.8	13.4	17.3	37.3	11.6	4.2	19.7	25.9
	no voucher	Xen011	Ethiopia	M		58.8	4.5	11.5	15	33.4	10.6	4	17.3	23
	no voucher	Xen012	Ethiopia	F		77.7	5.8	14.8	19.1	40.6	12.1	4.2	19.5	27.3
	no voucher	Xen013	Ethiopia	F		72	5.9	14.1	17.5	38.4	12	4.9	21	25.9
	no voucher	Xen014	Ethiopia	M		53.5	4.6	11.4	14.2	31.5	9.4	3.3	17	22.8
	no voucher	Xen015	Ethiopia	M		56.8	5.1	11.8	14.4	34.3	10.4	3.5	17.5	23
	no voucher	Xen016	Ethiopia	F		72.5	5.6	13.2	16.9	37.8	11.7	4.7	20	26.1
	no voucher	Xen017	Ethiopia	M		53.7	4.5	11.5	14.1	34.4	10.1	3.5	18	23.6
	no voucher	Xen018	Ethiopia	M		55.9	5.1	11.7	13.4	34.2	10.1	3.9	15.3	23.2
	no voucher	Xen019	Ethiopia	F		77.6	6	14.2	18.4	40.9	12.5	4.6	18.9	27.2
	no voucher	Xen020	Ethiopia	F		73.9	5.7	13.5	17.3	39	12.2	4.1	19.3	25.3
	aveF	maxF	stdevF	countF	aveM	maxM	stdevM	countM	aveALL	maxALL	stdevALL	countALL
	62.1633	77.7	13.127	24	50.0944	59.1	6.54066	25	52.662	77.7	13.8437	60
X. fischbergi
	CAS 255060	BJE3806	Nigeria: Jos	F	HOLOTYPE	51.68	6.23	11.59	13.45	27.26	3.09	2.49	18.39	18.22	15	16	24	28	22
	UWBM 5964	ADL3542	Ghana: Brong-Ahafo Region		PARATYPE										12	16	25	31
	CAS 255059	BJE3805	Nigeria: Jos	F	PARATYPE	60.95	7.4	13.78	16.85	34.54	10.58	3.41	25.95	21.74	14	16	26	26	22
	CAS 255061	BJE3807	Nigeria: Jos	F	PARATYPE	62.62	7.78	13.33	14.9	38.41	11.1	2.85	24.57	24.32
	MHNG 2644.060	AMNH17296	Nigeria: Jos	M	PARATYPE	52.3	4.3	11.2	13.4	30.2	8.5	3.7	16	19.7
	BMNH 1983.1501-20		Ghana: Bolgatanga	juveniles	PARATYPES (20)
	AMNH158377	MWK13208	Chad: Prifecture du Borkou-Ennedi-Tibesti
	CAS 100044		Ghana: Upper East Region	F?		41.46	5.83	9.95	12.19	27.31	8.9	2.72	18.09	16.79	13	11	26	27	24
	lost voucher (MHNG)	AMNH17297	Nigeria: Jos	F		58.9	4.9	12.6	14.3	30.2	10.3	3.9	17.1	21.3
	lost voucher (MHNG)	AMNH17299	Nigeria: Jos	F		61.2	5.4	12.5	13.3	32.2	9.5	3.6	16.2	20.1
	lost voucher (MHNG)	AMNH17298	Nigeria: Jos	M		50	4.5	11.2	12.4	29.2	9.2	3.4	15.1	18.6
	NMP6V 74744/1	VG10-280	Cameroon: Djingliya, Mandara Mts.	juvenile
	NMP6V 74744/2	VG10-281	Cameroon: Djingliya, Mandara Mts.	juvenile
	UWBM 5964	ADL3542	Ghana: Brong-Ahafo Region
	UTEP 21194	ELI 3206	DRC:Orientale: Bas Uele
	aveF	maxF	stdevF	countF	aveM	maxM	stdevM	countM	aveALL	maxALL	stdevALL	countALL			13.5	14.75	25.25	28	22.6667
	56.135	62.62	8.16996	6	51.15	52.3	1.62635	2	54.8887	62.62	7.30618	8			15	16	26	31	24
															12	11	24	26	22
															4	4	4	4	3
X. muelleri
	CAS 147175		Zambia	F		64.08	7.02	12.59	15.7	36.4	10.18	3.53	26.42	23.03	13	12	28	26	17
	CAS 160559		Namibia: Caprivi Region	F		80.24	8.16	15.05	22.7	46.02	14.71	4.87	32.71	30.89
	CAS 160560		Namibia: Caprivi Region	F		80.66	9.07	15.89	23.23	45.61	16.53	4.93	33.25	31.4	13	14	29	28	27
	CAS 160561		Namibia: Caprivi Region	F		76.24	8.88	15.27	20.33	34.86	13.85	4.38	30.2	29.98	14	14	27	30	26
	CAS 160562		Namibia: Caprivi Region												14	18	29	29	30
	CAS 160563		Namibia: Caprivi Region												16	15	31	32	29
	CAS 160564		Namibia: Caprivi Region	F		74.82	8.48	15.45	20.74	42.88	13.27	3.57	31.82	30.71	16	14	29	29	28
	CAS 160565		Namibia: Caprivi Region	F		74.49	7.74	15.07	20.66	41.13	13.7	4.15	30.61	29.12	15	15	30	30	25
	CAS 160566		Namibia: Caprivi Region												13	15	27	28	26
	CAS 160567		Namibia: Caprivi Region												15	15	32	34	31
	CAS 160568		Namibia: Caprivi Region												14	15	27	29	26
	CAS 160569		Namibia: Caprivi Region												12	15	30	30	25
	CAS 160570		Namibia: Caprivi Region												14	13	26	32	32
	CAS 160571		Namibia: Caprivi Region												13	16	24	26	25
	CAS 160572		Namibia: Caprivi Region												14	16	25	30	28
	CAS 160573		Namibia: Caprivi Region												14	15	31	25	26
	CAS 164437		Tanzania: Dar es Salaam Region	F		62.49	6.77	11.93	16.47	33.9	12.31	3.93	24.3	23.4	11	11	26	25	22
	CAS 164438		Tanzania: Dar es Salaam Region												11	12	26	24	19
	CAS 176692		Tanzania: Elono forest	F		69.4	8.23	13.56	19.47	41.76	12.98	3.72	27.02	28.14
	Xen203		Tanzania: Ifakara	F		75.3	5.3	14.1	16.4	37.7	11	4.3	19.9	25.5
	Xen204		Tanzania: Ifakara	F		76.6	5.3	13.7	16.4	34.6	11.3	4.2	18.2	24
	Xen207		Tanzania: Ifakara	F		77.5	4.7	13.9	17.4	37.8	11	3.9	17.4	25.6
	Xen208		Tanzania: Ifakara	F		71.5	5.1	12.9	15	35	9.6	4.1	16.4	22.3
	Xen209		Tanzania: Ifakara	F		76.7	5	14.5	17	36.7	10.6	4.2	19	23.9
	Xen210		Tanzania: Ifakara	F		74.6	5.2	15	16.3	34.1	9.6	4.1	17.9	22.4
	Xen211		Tanzania: Ifakara	F		73.5	5.4	14.5	15.9	37.4	9.6	4.1	20.2	25.2
	Xen212		Tanzania: Ifakara	F		73.1	5.4	13.4	15.6	35.1	9.6	3.6	19.4	23.5
	Xen213		Tanzania: Ifakara	F		71	4.6	13.5	16.3	33.9	10.4	3.8	18.2	24.2
	Xen214		Tanzania: Ifakara	F		73.9	5.9	14.4	16.8	37.5	10.7	4.6	19.1	24.1
	CAS 168685		Tanzania: East Usambara	F		55.6	7.39	11.74	15.47	33.01	11.7	3.23	22.9	18.64
	CAS 160246		Namibia: Caprivi strip	M		57.68	6.32	11.69	15.72	36.58	10.99	3.97	25.24	23.81
	CAS 164438		Tanzania	M		55.85	6.58	11.63	15.67	32.52	11.2	3.3	24.81	23.1
	CAS 164969		Kenya: Kikifi,	M		49.6	6.46	11.46	15.02	31.51	10.06	3.05	23.11	20.75
	Xen205		Tanzania: Ifakara	M		60.7	4.5	12.4	14.3	33.2	9.5	3.3	16.4	21.9
	Xen206		Tanzania: Ifakara	M		57.2	4.7	12	13.2	30.9	9.3	3.7	16.8	20.8
	Xen215		Tanzania: Ifakara	M		57.3	4.5	11.8	12.9	31.6	8.6	4.1	15.8	20.2
	Xen216		Tanzania: Ifakara	M		59	4.8	12	13.5	34.3	9.7	3.9	17.4	21.6
	Xen217		Tanzania: Ifakara	M		58.3	4.7	12.5	14.5	34.9	9	4	16.7	21.7
	Xen218		Tanzania: Ifakara	M		57.4	4.3	12.7	15.3	31.9	8.6	4	16.1	20.8
	Xen219		Tanzania: Ifakara	M		58.2	4.7	11.9	13.2	32.8	9.4	4.5	16.5	20.3
	Xen220		Tanzania: Ifakara	M		56.2	4.5	11.5	12.8	32.5	8.9	4	17	20.3
	Xen221		Tanzania: Ifakara	M		57.8	5.1	11.9	14.6	32.8	9.2	3.6	16.7	20.5
	Xen222		Tanzania: Ifakara	M		58.4	5	12.3	14.6	33.8	8.9	4	16.4	21.4
	CAS 160567		Namibia: Caprivi strip			32.68	4.37	7.53	9.36	22.34	7.14	2.47	15.2	14.63
	CAS 164438		Tanzania: Llala, Dar Es Salaam			55.1	6.63	11.79	16.1	34.12	10.21	3.24	24.57	23.25
	MHNG 2644.63	AMNH17308	Tanzania: Ifakara
	no voucher	RT3	Swaziland: Nkambeni Area
	no voucher	xen225	Malawi; near Blantyre
	aveF	maxF	stdevF	countF	aveM	maxM	aveM	countM	aveALL	maxALL	aveALL	countALL			13.6471	14.4118	28.0588	28.6471	26
	72.7221	80.66	6.20695	19	57.2023	60.7	2.58784	13	65.0921	80.66	10.7866	34			16	18	32	34	32
															11	11	24	24	17
															17	17	17	17	17
X. largeni
	MHNG 2644.059	AMNH17292	Ethiopia	F		54.3	4.1	10	11.2	26.9	8	2.8	14.2	15.9
	MHNG 2645.088	AMNH17293	Ethiopia	M		39.7	3.8	9	10.4	23.4	7.4	2.7	13.3	15.8
	MHNG 2645.089	AMNH17294	Ethiopia	M		44	3.8	9.2	10.3	25.5	8	3.1	13.8	16.7
	MHNG 2645.090	AMNH17295	Ethiopia	F		46	4.4	9.4	11.8	26.7	8	2.9	12.7	15.7
	MCZ cryogenic 333	BJE1505	Ethiopia: Ana Anasura	F		41.37	4.02				9	4.28	18.97	14.41
	MCZ cryogenic 334	BJE1506	Ethiopia: Ana Anasura	M		39.8	3.99				8.97	4.04	18.89	14.8
	MCZ cryogenic 335	BJE1507	Ethiopia: Ana Anasura	F		41.1	4.28				9.2	3.9	19.54	15.44
	MCZ cryogenic 336	BJE1508	Ethiopia: Ana Anasura	F		37.8	3.84				8.91	3.8	17.32	14.56
	MCZ cryogenic 337	BJE1509	Ethiopia: Ana Anasura	F		41.17	4.22				9.1	3.98	18.61	16.06
	MCZ cryogenic 407	BJE1579	Ethiopia: West Gojam	JUVENILE		20.37	2.67				4.84	2.69	9.28	8.69
	MCZ cryogenic 408	BJE1580	Ethiopia: West Gojam	JUVENILE		19.09	2.66				4.61	2.8	8.42	8.12
	MCZ cryogenic 409	BJE1581	Ethiopia: West Gojam	JUVENILE		19.83	2.53				5.06	2.62	8.73	8.03
	MCZ cryogenic 410	BJE1582	Ethiopia: West Gojam	JUVENILE		20.89	2.7				5.52	3.44	9.85	8.85
	MCZ cryogenic 411	BJE1583	Ethiopia: West Gojam	JUVENILE		20.47	2.59				4.81	3.43	8.59	8.39
	no voucher	Xen170	Ethiopia	F		49.8	3.9	9.8	11.7	27.5	8.9	2.8	14.8	17
	no voucher	Xen171	Ethiopia	M		41.2	3.9	9.1	11.5	24.9	8.3	3.4	13.3	16.6
	no voucher	Xen172	Ethiopia	F		48	4.7	9.5	11.4	27.5	8.8	3	14.2	16.6
	no voucher	Xen173	Ethiopia	M		40.6	4.3	9	10.7	24.3	8	2.8	13	15.6
	no voucher	Xen174	Ethiopia	M		40.4	3.7	8.7	9.9	23.7	7.5	2.3	12.4	15.4
	no voucher	Xen175	Ethiopia	M		39.4	4	8.9	9.8	24.5	7.4	2.5	12.7	15.5
	no voucher	Xen176	Ethiopia	M		42.4	3.9	8.6	10.5	24.8	7.9	2.8	13.7	15.8
	no voucher	Xen177	Ethiopia	M		39.4	4.5	9.4	10.2	24.7	7.4	2.5	12.9	15.9
	no voucher	Xen178	Ethiopia	M		39.7	3.7	9.2	9.7	25	8	2.5	12.8	16
	no voucher	Xen179	Ethiopia	M		41.3	3.9	9.3	10.2	24.5	7.6	2.9	12.3	16.2
	no voucher	Xen180	Ethiopia	M		39.4	3.7	8.6	9.8	24.4	8	2.9	12.8	14.4
	no voucher	Xen181	Ethiopia	M		40	4.5	9	10	24.1	7.3	2.6	12.7	16.2
	no voucher	Xen182	Ethiopia	F		42.3	4.2	9.3	10.3	24.7	8	3.1	12.6	16.4
	MCZ cryogenic 432	Z23306	Ethiopia: North Gonder	JUVENILE		13.07	1.91				3.44	1.79	5.56	5.69
	MCZ cryogenic 434	Z23308	Ethiopia: North Gonder	JUVENILE		12.86	1.91				3.56	1.88	5.46	5.83
	MCZ cryogenic 435	Z23309	Ethiopia: North Gonder	JUVENILE		11.67	2.23				3.57	2.14	5.58	6.22
	aveF	maxF	stdevF	countF	aveM	maxM	stdevM	countM	aveALL	maxALL	stdevALL	countALL
	44.6489	54.3	5.25127	9	40.5615	44	1.37267	13	35.5797	54.3	11.8846	30
